# 1 **IFITM proteins promote SARS-CoV-2 infection of human lung cells**

2 Caterina Prelli Bozzo<sup>1</sup>, Rayhane Nchioua<sup>1</sup>, Meta Volcic<sup>1</sup>, Lukas Wettstein<sup>1</sup>, Tatjana Weil<sup>1</sup>,  
3 Jana Krüger<sup>2</sup>, Sandra Heller<sup>2</sup>, Carina Conzelmann<sup>1</sup>, Janis Müller<sup>1</sup>, Rüdiger Gross<sup>1</sup>, Fabian Zech<sup>1</sup>,  
4 Desiree Schütz<sup>1</sup>, Lennart Koepke<sup>1</sup>, Christina M Stuerzel<sup>1</sup>, Christiane Schüler<sup>3</sup>, Saskia Stenzel<sup>3</sup>,  
5 Elisabeth Braun<sup>1</sup>, Johanna Weiß<sup>1</sup>, Daniel Sauter<sup>1</sup>, Jan Münch<sup>1</sup>, Steffen Stenger<sup>4</sup>, Kei Sato<sup>5</sup>,  
6 Alexander Kleger<sup>2</sup>, Christine Goffinet<sup>3</sup>, Konstantin M.J. Sparrer<sup>1\*</sup> and Frank Kirchhoff<sup>1\*</sup>

7

8 <sup>1</sup> Institute for Molecular Virology  
9 Ulm University Medical Centre  
10 89081 Ulm, Germany

11

12 <sup>2</sup> Department of Internal Medicine I  
13 Ulm University Medical Centre  
14 89081 Ulm, Germany

15

16 <sup>3</sup> Institute of Virology  
17 Campus Charité Mitte  
18 Charité - Universitätsmedizin Berlin  
19 10117 Berlin, Germany

20

21 <sup>4</sup> Institute of Medical Microbiology and Hygiene  
22 Ulm University Medical Centre  
23 89081 Ulm, Germany

24

25 <sup>5</sup> Laboratory of Systems Virology  
26 Institute for Frontier Life and Medical Sciences  
27 Kyoto University, Kyoto, Japan.

28

29 \* Correspondence: [konstantin.sparrer@uni-ulm.de](mailto:konstantin.sparrer@uni-ulm.de) or [Frank.Kirchhoff@uni-ulm.de](mailto:Frank.Kirchhoff@uni-ulm.de)

30

31 Running title: IFITMs promote SARS-CoV-2 infection

32

33 **KEYWORDS:** SARS-CoV-2, Interferon-induced transmembrane proteins, spike glycoproteins,  
34 human lung cells, viral entry cofactors

35 **ABSTRACT**

36 **Interferon-induced transmembrane proteins (IFITMs 1, 2 and 3) restrict numerous viral**  
37 **pathogens and are thought to prevent infection by severe acute respiratory syndrome**  
38 **coronaviruses (SARS-CoVs). However, most evidence comes from single-round pseudoparticle**  
39 **infection of cells artificially overexpressing IFITMs. Here, we confirmed that overexpression**  
40 **of IFITMs blocks pseudoparticle infections mediated by the Spike proteins of  $\beta$ -coronaviruses**  
41 **including pandemic SARS-CoV-2. In striking contrast, however, endogenous IFITM**  
42 **expression promoted genuine SARS-CoV-2 infection in human lung cells both in the presence**  
43 **and absence of interferon. IFITM2 was most critical for efficient entry of SARS-CoV-2 and**  
44 **enhanced virus production from Calu-3 cells by several orders of magnitude. IFITMs are**  
45 **expressed and further induced by interferons in the lung representing the primary site of**  
46 **SARS-CoV-2 infection as well as in other relevant tissues. Our finding that IFITMs enhance**  
47 **SARS-CoV-2 infection under conditions approximating the *in vivo* situation shows that they**  
48 **may promote viral invasion during COVID-19.**

49

50 **HIGHLIGHTS**

- 51 • **Overexpression of IFITM1, 2 and 3 restricts SARS-CoV-2 infection**
- 52 • **Endogenous IFITM1, 2 and 3 boost SARS-CoV-2 infection of human lung cells**
- 53 • **IFITM2 is critical for efficient entry of SARS-CoV-2 in Calu-3 cells**

## 54 INTRODUCTION

55 SARS-CoV-2 is the cause of pandemic Coronavirus disease 2019 (COVID-19). Originating from  
56 China in late 2019, the virus spread rapidly, causing a serious threat to human health worldwide,  
57 impacting our daily lives and global economy (Zhou et al., 2020). Most countries have enacted  
58 protective measures to curb the pandemic. Yet transmission rates remain high and the virus has  
59 infected more than 21 million people around the globe (<https://coronavirus.jhu.edu/map.html>). While  
60 SARS-CoV-2 spreads more efficiently than SARS-CoV and MERS-CoV, the previously emerging  
61 causative agents of severe acute respiratory syndromes (SARS), it shows a lower case-fatality rate  
62 (~2 to 5%), compared to ~10% and almost 40%, respectively (Bermingham et al., 2012; Ksiazek et  
63 al., 2003). It has been reported that SARS-CoV-2 is more susceptible to inhibition by interferons  
64 (IFNs) than SARS-CoV (Mantlo et al., 2020) and treatment with IFNs is considered a therapeutic  
65 option to treat COVID-19 (Sallard et al., 2020). However, IFNs may also exert detrimental effects  
66 and contribute to tissues damage and severe COVID-19 (Major et al., 2020). Finally, IFNs and other  
67 pro-inflammatory cytokines induce hundreds of cellular factors (Sparrer and Gack, 2015) whose  
68 effects on SARS-CoV-2 infection are currently poorly understood (Sa Ribero et al., 2020).

69 Here, we focused on innate immune effectors that may target the first essential step of SARS-  
70 CoV-2 replication: entry into its target cells. To enter host cells, the receptor-binding-domain of the  
71 SARS-CoV-2 Spike (S) protein recognizes the cell surface receptor angiotensin-converting enzyme  
72 2 (ACE2) (Hoffmann et al., 2020a; Letko et al., 2020). To undergo the required conformational  
73 changes for fusion, the S protein is proteolytically cleaved into S1 and S2 by TMPRSS2 on the plasma  
74 membrane or by lysosomal proteases (Hoffmann et al., 2020b, 2020a; Matsuyama et al., 2010). A  
75 prominent family of IFN stimulated genes (ISGs) known to inhibit fusion between the viral and  
76 cellular membranes are interferon-inducible transmembrane (IFITM) proteins (Diamond and Farzan,  
77 2013; Zhao et al., 2019). These trans-membrane proteins restrict entry of many enveloped viruses  
78 including Influenza A viruses, Flaviviruses, Rhabdoviruses, Bunyaviruses and human

79 immunodeficiency viruses (Diamond and Farzan, 2013; Huang et al., 2011). It has also been shown  
80 that overexpression of IFITM proteins inhibits transduction by viral particles pseudotyped with the S  
81 proteins of SARS- and MERS-CoVs (Huang et al., 2011; Wrensch et al., 2014). Thus, it is thought  
82 that IFITMs restrict replication of pathogenic SARS coronaviruses (Bailey et al., 2014). Notably,  
83 previous studies have reported that IFITMs can enhance infection with the non-epidemic human  
84 Coronavirus OC43 (Huang et al., 2011; Wrensch et al., 2014; Zhao et al., 2014). Furthermore,  
85 mutants of IFITM3 were reported to promote the infection of many Coronaviruses, including SARS-  
86 CoV-2 (Shi et al., 2020).

87 The three best characterised members of the IFITM family are IFITM1, IFITM2 and IFITM3  
88 (Bailey et al., 2014; Ferreira et al., 2013; Shi et al., 2017; Smith et al., 2014). They contain different  
89 sorting motifs and IFITM1 is mainly localised at the plasma membrane, while IFITM2 and 3 are  
90 found inside the cell on endo-lysosomal membranes (Bailey et al., 2014). The molecular  
91 mechanism(s) underlying the target cell antiviral activity of IFITMs are not fully understood.  
92 However, recent reports suggest that they modulate membrane rigidity and curvature to prevent  
93 fusion of the viral and cellular membranes (Li et al., 2013; Shi et al., 2017; Zani and Yount, 2018).

94 Here, we examined whether IFITMs may restrict SARS-CoV-2. In agreement with previous  
95 reports on SARS- and MERS-CoV (Huang et al., 2011; Wrensch et al., 2014) and very recent data  
96 on SARS-CoV-2 (Shi et al., 2020), we found that overexpression of IFITMs blocks entry mediated  
97 by the SARS-CoV-2 S protein, with IFITM1 and IFITM2 being more potent than IFITM3. Contrary  
98 to our expectations, however, siRNA-mediated knock-down of IFITMs strongly reduced the  
99 efficiency of SARS-CoV-2 replication in human lung cells. In particular, endogenous IFITM2  
100 expression was critical for efficient entry of genuine SARS-CoV-2. Our results suggest that SARS-  
101 CoV-2 hijacks IFITMs for efficient replication and spread under physiological conditions.

## 102 RESULTS

### 103 IFITMs block SARS-CoV-2 S-mediated pseudoparticle infection

104 To examine whether IFITM proteins inhibit SARS-CoV-2 S-dependent viral entry, we used  
105 HEK293T transiently expressing ACE2 and pseudotyped viral particles. Specifically, Vesicular-  
106 Stomatitis-Virus (VSV) containing a *luciferase* reporter gene instead of the open reading frame for  
107 its Glycoprotein (VSV(luc) $\Delta$ G) was pseudotyped with the SARS-CoV-2 S protein (Figure 1A).  
108 HEK293T cells overexpressing the individual IFITMs were exposed to these pseudoparticles (pp)  
109 and the levels of infection quantified by luciferase assay. We found that overexpression of IFITM1  
110 and IFITM2 inhibits SARS-CoV-2 S-mediated VSVpp infection dose-dependently by up to two  
111 orders of magnitude, while IFITM3 was less effective (Figure 1B). As control, we used PSGL-1 a  
112 broad-spectrum inhibitor of virus attachment (Fu et al., 2020) and confirmed that it prevents SARS-  
113 CoV-2 S-mediated infection (He et al., 2020). None of the IFITMs prevented VSV-G dependent entry  
114 (Figure S1A). Thus, the inhibitory effect was SARS-CoV-2 S-specific. Potent inhibition of SARS-  
115 CoV-2 S-mediated infection by IFITMs was confirmed using lentiviral pseudoparticles (Figure 1C).

116 It has been reported, that IFITMs can be incorporated into budding HIV-1 virions and reduce their  
117 infectivity (Tartour et al., 2014). Thus, we also examined whether IFITMs expression in the virus  
118 producer cells affects the infectious titer of SARS-CoV-2 S VSVpp (Figure 1D). However,  
119 overexpression of IFITMs in the producer cells had little if any restrictive effects (Figure 1E). IFITM1  
120 even slightly increased VSVpp infectivity at low expression levels (Figure 1E), possibly because it  
121 moderately enhances incorporation of the SARS-CoV-2 S protein into VSV particles (Figure S1B).  
122 Again, IFITM expression in the producer cells had no effect on VSV-G containing particles (Figure  
123 S1C).

124 To examine the effect of endogenous IFITM expression on S-mediated VSVpp infection, we  
125 performed siRNA knock-down (KD) studies in the human epithelial lung cancer cell line Calu-3,

126 which expresses ACE2 and all three IFITM proteins (Figure S1D). Silencing of endogenous IFITM  
127 expression enhanced infection mediated by the SARS-CoV-2 S protein about 3- to 7-fold and similar  
128 results were obtained with VSVpp containing the SARS-CoV S protein (Figure 1F). Altogether, these  
129 data show that transient and endogenous IFITM expression inhibit SARS-CoV-2 S-mediated viral  
130 entry in single-round pseudoparticle infection assays.

### 131 **IFITMs impair SARS-CoV-2 S-mediated membrane fusion**

132 IFITM proteins inhibit viral infections by preventing fusion between the viral and cellular membranes  
133 (Shi et al., 2017; Zani and Yount, 2018). To determine whether IFITMs also affect cell-to-cell fusion  
134 mediated by the SARS-CoV-2 S protein and the ACE2 receptor, we used a split-GFP assay (Figure  
135 S2A). All three IFITMs inhibited fusion between SARS-CoV-2 S and ACE2 expressing HEK293T  
136 cells in a dose-dependent manner (Figure 2A). To analyse the impact of IFITMs on S-mediated fusion  
137 between virions and target cells, we used HIV-1 particles containing  $\beta$ -lactamase-Vpr fusions as  
138 previously described (Cavrois et al., 2014), except that the virions contained the SARS-CoV-2 S  
139 instead of the HIV-1 Env protein. Expression of IFITM1, 2 or 3 all prevented fusion of SARS-CoV-  
140 2 S HIVpp with ACE2 expressing target cells (Figure 2B).

141 To examine whether endogenous IFITM expression affects the interaction between the S protein  
142 on VSVpp and the ACE2 receptor on the target cells, we performed proximity ligation assays (PLA)  
143 assays in Calu-3 cells. siRNA silencing of IFITM1, 2 and 3 significantly increased the numbers of  
144 PLA foci (Figure 2C). Thus, IFITMs reduce the number of S molecules that are in close proximity to  
145 the ACE2 receptor after VSVpp exposure. To further investigate this, HeLa cells were depleted of  
146 endogenous IFITM1 and 3 (they do not express IFITM2), transfected with an ACE2 expression  
147 vector, and exposed to S-containing VSVpp. In agreement with the results obtained in Calu-3 cells,  
148 KD of IFITM1 or IFITM3 increased the number of S/ACE2 foci by about 4- and 10-fold, respectively

149 (Figures S2B, S2C). Taken together, our results show that all three IFITMs prevent SARS-CoV-2  
150 S/ACE2-mediated attachment and membrane fusion in single round pseudotype infection assays.

### 151 **Susceptibility of S proteins of SARS-CoV-2 and related CoVs to IFITM overexpression**

152 It has been reported that overexpression of IFITMs inhibits the function of the S proteins of the two  
153 previously emerging highly pathogenic SARS- and MERS-CoV (Huang et al., 2011; Wrensch et al.,  
154 2014) and SARS-Co-2 (Shi et al., 2020). However, whether the two human SARS CoVs differ in  
155 their susceptibility to IFITM-mediated inhibition and whether the sensitivity of SARS-CoV-2  
156 changed after zoonotic transmission is not known. To examine this, we analysed the S proteins of the  
157 two human viruses (SARS-CoV-2, SARS-CoV) and the bat (RaTG13-CoV) and pangolin viruses  
158 (Pang-CoV) that are closely related to SARS-CoV-2 (Figure S2D) (Lam et al., 2020; Zhou et al.,  
159 2020). VSVpp harbouring the various S proteins were used to transduce HEK293T cells coexpressing  
160 individual IFITMs and ACE2. Pseudoparticles of SARS-CoV-2 and its closest animal relatives  
161 RaTG13-CoV and Pang-CoV showed similar patterns and degrees of sensitivity to overexpression of  
162 IFITM1, 2 and 3 (Figure 2D). SARS-CoV S pseudovirions were also efficiently restricted by IFITM1  
163 and 2 and even more susceptible to inhibition by IFITM3 than SARS-CoV-2 S pseudovirions.  
164 Altogether, our results showed that the susceptibility of SARS-CoV-2 to inhibition by IFITMs did  
165 not markedly change after zoonotic transmission at least in transfected HEK293T cells.

### 166 **Determinants of IFITM-mediated inhibition of SARS-CoV-2 S in HEK293T cells**

167 Previous analyses showed that the antiviral activity of IFIM proteins is modulated by ubiquitination  
168 and palmitoylation (Narayana et al., 2015; Yount et al., 2010). To analyse whether these post-  
169 transcriptional modifications also impact their ability to prevent SARS-CoV-2 S-mediated infection,  
170 we generated ubiquitination and palmitoylation defective mutants of IFITM1, 2 and 3 (Figure S2E).  
171 As expected, ubiquitination- and palmitoylation-defective mutants of IFITM2 and IFITM3 showed  
172 reduced activity in counteracting SARS-CoV-2 S-mediated entry of VSVpp (Figure S2F). It has been

173 documented that a Y20A mutation or deletion of the N-terminal 21 amino acids of IFITM3 converts  
174 this restriction factor to an enhancer of MERS-CoV or SARS-CoV S-mediated entry (Jia et al., 2012;  
175 Zhao et al., 2019). In line with these findings and recent data on SARS-CoV-2 (Shi et al., 2020), both  
176 N-terminal mutants of IFITM3 moderately enhanced VSVpp entry via the SARS-CoV-2 S protein  
177 (Figure S2F,G) upon transient overexpression or stable expression in HEK293T cells. Thus, specific  
178 mutations convert IFITM3 from an inhibitor to an enhancer of SARS-CoV-2 S-mediated VSVpp  
179 infection in transfected HEK293T cells.

### 180 **Overexpression of IFITMs inhibits wildtype SARS-CoV-2 infection in HEK293T cells**

181 To determine whether IFITMs also prevent infection by genuine SARS-CoV-2, we infected  
182 HEK293T cells overexpressing ACE2 alone or together with IFITMs with a wildtype isolate of  
183 SARS-CoV-2 at an MOI of 0.05 and measured viral RNA yields in the culture supernatants by qPCR  
184 two days later. On average, overexpression of IFITM1 and 2 reduced viral RNA yields by 31.7- and  
185 135.5-fold, respectively (Figure 3A, S3). In comparison, IFITM3 had more modest effects but also  
186 achieved about 5-fold inhibition at higher dose, while PSGL-1 reduced virus yields by 14.2-fold  
187 (Figure 3A). Thus, in agreement with the inhibitory effects observed using SARS-CoV-2 S VSV or  
188 HIV pseudoparticles, overexpression of the three IFITM proteins in HEK293T cells strongly  
189 inhibited replication of genuine SARS-CoV-2. Similar to the results obtained on S-mediated VSVpp  
190 infection (Figure 1B), overexpression of IFITM1 was most and IFITM3 least effective in preventing  
191 wildtype SARS-CoV-2 replication in HEK293T cells.

### 192 **IFITMs are expressed in relevant tissues and induced upon IFN stimulation**

193 To better assess the potential relevance of the different IFITMs in restricting SARS-CoV-2  
194 replication in infected individuals, and Calu-3 cells as a model, we compared expression levels of  
195 IFITM proteins in primary human lung bronchial epithelial cells (NHBE), and human intestinal  
196 organoids derived from pluripotent stem cells with Calu-3 cells. These cell types and organoids



197 represent the sites of SARS-CoV-2 entry and subsequent spread, i.e. the lung and the gastrointestinal  
198 tract (Hoffmann et al., 2020a; Krüger et al., 2020; Lamers et al., 2020). Western Blot analyses showed  
199 that IFITM2 and 3 are constitutively expressed at low levels in Calu-3 cells and NHBE (Figure 3B).  
200 Treatment with IFN- $\alpha$ ,  $\beta$  or  $\gamma$  generally induced the expression of all three IFITM proteins, albeit  
201 with different efficiencies in different cell types. For example, IFN- $\beta$  was highly effective in inducing  
202 IFITM1 and IFITM2 in NHBE, while IFN- $\gamma$  most efficiently increased IFITM1 expression levels in  
203 Calu-3 cells (Figure 3B). Expression of IFITM1 at the plasma membrane was clearly visible in gut  
204 organoids using confocal microscopy upon IFN- $\beta$  stimulation (Figure 3C). Similarly, upon  
205 stimulation, IFITM2 and IFITM3 display a cytoplasmic or vesicle-like localization as previously  
206 described (Huang et al., 2011). In summary, IFN inducibility and basal expression of IFITM proteins  
207 in lung cells and primary tissues relevant for SARS-CoV-2 infection clearly support a role of IFITMs  
208 for viral spread *in vivo*. Our finding that Calu-3 cells express similar endogenous and IFN induced  
209 levels of IFITMs as primary lung cells support their relevance for studies on SARS-CoV-2 infection.

### 210 **Endogenous IFITM expression enhances SARS-CoV-2 entry and replication**

211 Thus far, our results strongly suggested that IFITM proteins are efficient inhibitors of SARS-CoV-2  
212 S-mediated viral entry. To verify this under conditions more closely reflecting the *in vivo* situation,  
213 we examined the impact of endogenous IFITM expression on genuine SARS-CoV-2 infection of  
214 human lung cells. To this end, we treated Calu-3 cells with siRNAs targeting IFITM1, 2 and 3 or a  
215 combination thereof (Figure S4A), infected them with SARS-CoV-2, and determined the levels of  
216 cell-associated viral RNA early after viral exposure as indicator of viral entry. It came as surprise that  
217 silencing of endogenous IFITM expression severely impaired SARS-CoV-2 infection. At 6 h post-  
218 infection depletion of IFITMs 1, 2 and 3 reduced the levels of cell-associated viral RNA about 3-,  
219 22- and 4-fold, respectively (Figure 4A). The effects of IFITM1 and 3 silencing were similar at 24 h

220 post-infection, while reduced expression of IFITM2 even decreased viral entry by more than two  
221 orders of magnitude at this later time point (Figure 4B).

222 Our findings showed that endogenous expression of IFITM proteins in human lung cells does not  
223 restrict but strongly promotes SARS-CoV-2 infection. To further examine this, we determined the  
224 levels of cell-free SARS-CoV-2 RNA at 24 h post-infection. In agreement with the effects on cell-  
225 associated viral loads, silencing of IFITMs 1, 2 and 3 reduced SARS-CoV-2 RNA yield in the culture  
226 supernatants on average by 5.2-, 65.7- and 2.9-fold respectively (Figure 4C). Independent  
227 experiments, in which supernatants were harvested 48 h post infection, confirmed that endogenous  
228 IFITM expression is critical for efficient SARS-CoV-2 replication in Calu-3 cells (Figure 4D).

229 In the absence of IFN treatment, KD of IFITMs generally reduced SARS-CoV-2 RNA production  
230 (Figure 4A-D). In some experiments, IFN- $\beta$  treatment prevented SARS-CoV-2 replication almost  
231 entirely and silencing of IFITMs had only modest additional effects (Figure 4B, 4C). However, the  
232 dependency of SARS-CoV-2 on IFITM proteins for effective virus production was confirmed under  
233 non-saturating conditions, when IFN- $\beta$  reduced but not fully prevented SARS-CoV-2 replication. For  
234 example, IFN- $\beta$  treatment reduced SARS-CoV-2 RNA levels on average about 22-fold at 48 h post-  
235 infection and KD of IFITM1, 2 and 3 further reduced viral RNA yields by factors of 35.4-, 67.5- and  
236 8.9-fold, respectively (Figure 4D, S4B, C). To determine differences in the infectious titer, we  
237 infected Vero cells with supernatants from the IFN- $\beta$  treated Calu-3 cells and determined the virus-  
238 induced cytopathic effects (CPE). After infection with supernatants obtained from Calu-3 cells  
239 treated with the control siRNA analysis CPE was visible up to a dilution of  $10^{-6}$ , indicating the  
240 presence of infectious SARS-CoV-2 (Figure S4D). The virus-induced CPE was drastically reduced  
241 upon siRNA mediated knockdown of IFITM proteins. Upon depletion of IFITM1 modest CPE was  
242 only observed at a dilution of  $10^{-2}$ , while silencing of IFITM3 expression reduced the CPE caused by  
243 infectious SARS-CoV-2 down to a dilution of  $10^{-3}$ . No virus-induced CPE was observed at any  
244 dilution upon depletion of IFITM2 or all three IFITM proteins (Figure S4D). This result indicates

245 that lack of IFITM2 expression reduced infectious SARS-CoV-2 yield by more than four orders of  
246 magnitude. Our finding that IFITM2 had the strongest effect agrees with the results of the qPCR  
247 assays. Notably, titration experiments showed that IFITMs do not promote genuine SARS-CoV-2  
248 infection in HEK239T cells over a broad range of expression levels (Figure S4E). Thus, the opposing  
249 effects of IFITMs on SARS-CoV2 infection in HEK293T and Calu-3 cells do apparently not just  
250 dependent on different expression levels.

251 While all three IFITM proteins promoted SARS-CoV-2 replication in Calu-3 cells, IFITM2 had  
252 by far the strongest effect. To obtain first insight into a possible role of IFITMs as SARS-CoV-2  
253 entry cofactors, we infected Calu-3 cells with the wildtype virus and performed PLA assays to detect  
254 possible interactions between the viral S protein and the three IFITM proteins. In agreement with a  
255 potential role as cofactor for SARS-CoV-2 infection, a significant number of IFITM2/S foci were  
256 detectable, while only a few signals were observed for IFITM1 and IFITM3 (Figure 4E). Taken  
257 together, our data suggest that IFITM2 is an important cofactor of SARS-CoV-2 entry into human  
258 lung cells.

259

## 260 DISCUSSION

261 The present study demonstrates that endogenous expression of IFITMs is required for efficient  
262 replication of SARS-CoV-2 in a human lung cell line. This finding came as surprise since IFITMs  
263 are well known as important effectors of innate antiviral immunity and have been shown to inhibit  
264 SARS-CoV, MERS-CoV and, very recently, SARS-CoV-2 S pseudotype infection in overexpression  
265 assays (Huang et al., 2011; Shi et al., 2020; Wrensch et al., 2014). Confirming and expanding these  
266 previous studies, we show that overexpression of IFITM proteins in HEK293T cells prevents S-  
267 mediated VSVpp and HIVpp fusion as well as genuine SARS-CoV-2 entry. However, exactly the  
268 opposite was observed for genuine SARS-CoV-2 upon manipulation of endogenous IFITM  
269 expression levels in human lung cells. Silencing of all three IFITM proteins reduced SARS-CoV-2  
270 entry. However, IFITM2 had the most striking effect and our results suggest that silencing of this  
271 factor reduced infectious SARS-CoV-2 production by at least four orders of magnitude. Our results  
272 provide novel and highly unexpected insights into the role of IFITM proteins in the spread and  
273 pathogenesis of SARS-CoV-2 and suggest that these supposedly antiviral factors are hijacked by  
274 SARS-CoV-2 as cofactors for efficient entry.

275 While IFITMs are generally considered to be inhibitors of viral pathogens enhancing effects on  
276 infection of human coronaviruses have been reported for specific mutant forms of IFITM3.  
277 Specifically, it has been shown that a single point mutation of Y20A converts IFITM3 from an  
278 inhibitor to an enhancer of SARS- and MERS-CoV S-mediated pseudoparticle transduction (Zhao et  
279 al., 2017). In agreement with recent data (Shi et al., 2020), we confirmed this enhancing effect for  
280 VSVpp carrying the SARS-CoV-2 S protein (Figure S2F, S2G). Notably, while IFITMs were  
281 reported to inhibit SARS-CoV, 229E, MERS-CoV and SARS-CoV-2 (Huang et al., 2011; Shi et al.,  
282 2020; Wrensch et al., 2014), they have been shown to enhance infection of human CoV-OC43, one  
283 of the major etiological agents of common cold (Zhao et al., 2014). Unlike SARS-CoV and SARS-  
284 CoV-2, CoV-OC43 does not utilize ACE2 as an entry receptor. We found that expression of all three

285 IFITM proteins enhance SARS-CoV-2 infection of human lung cells, while only IFITM2 and IFITM3  
286 promoted infection by CoV-OC43 in the previous study. Thus, although both human coronaviruses  
287 apparently highjack IFITM for efficient infection they show overlapping but distinct preferences for  
288 utilization of specific IFITM proteins.

289 Studies using single-cycle viral pseudoparticles in transfected HEK293T cells have provided  
290 important insights into cellular factors restricting viral entry. However, our finding that IFITMs have  
291 opposite effects on S-mediated pseudoparticle infection in transiently transfected HEK293T cells and  
292 genuine SARS-CoV-2 infection of human lung cells underlines the importance for verification of  
293 antiviral effects under more physiological conditions. In addition, the evidence that some other ISGs,  
294 such as LY6E and Cholesterol 25-hydrolase (CH25H), impair SARS-CoV-2 replication by blocking  
295 the fusion of virions also comes largely from analyses of S pseudotypes and conditions of IFITM  
296 overexpression (Pfaender et al., 2020; Zang et al., 2020; Zhao et al., 2020). Thus, the antiviral effect  
297 of presumed inhibitory factors of SARS-CoV-2 entry should be challenged under conditions more  
298 closely reflecting the *in vivo* situation. For SARS-CoV-2, we have initiated studies in lung and gut  
299 organoid systems.

300 The exact reasons for the opposing effects of overexpressed and endogenous IFITMs exposure to  
301 single cycle SARS-CoV-2 S pseudotyped virus and wildtype SARS-CoV-2 remain to be determined.  
302 Previous studies suggested that the subcellular localization, membrane curvature, endocytic activity  
303 and lipid composition may affect the antiviral activity of IFITM proteins (Chesarino et al., 2014;  
304 Guo et al., 2020; Zhao et al., 2017). Alterations in any of these viral features might affect the balance  
305 between restricting and enhancing effects on viral entry. We found that IFITM2 is about an order of  
306 magnitude most potent in enhancing SARS CoV-2 entry and replication compared to IFITM1 and  
307 IFITM3 (Figure 4A-D). PLA assays revealed that IFITM2 is frequently in close proximity to the  
308 Spike protein after exposure of lung cell to SARS CoV-2 (Figure 4E). Thus, it is tempting to speculate  
309 that the SARS CoV-2 Spike protein may interact with IFITM2 to highjack it for efficient viral entry

310 and we are currently investigating this. Other data show that IFITM overexpression in HEK29T cells  
311 inhibits both S-mediated transduction by VSV and HIV pseudoparticles (Figure 1B, 1C), as well as  
312 replication of genuine SARS-CoV-2 (Figure 3A). Thus, the enhancing effect was specifically  
313 observed for endogenous expression of IFITMs in human lung cells and wildtype SARS-CoV-2. This  
314 explains why enhancing effect were missed in previous studies. Importantly, these are the conditions  
315 that most closely approximate replication of SARS-CoV-2 in infected individuals.

316 In summary, our data show that IFITMs which are well-known as broad-spectrum inhibitors of  
317 many viral pathogens may serve as entry cofactors for SARS-CoV-2 infection of human lung cells.  
318 IFITMs are efficiently induced during the innate immune response in SARS-CoV-2 infected  
319 individuals (Blanco-Melo et al., 2020; Hadjadj et al., 2020). Consequently, the ability to utilize  
320 IFITMs as infection cofactor may play a key role in the ability of SARS-CoV-2 to invade the lower  
321 respiratory tract under inflammatory conditions, which represents a hallmark of severe COVID-19.  
322 Thus, it will be interesting to examine whether antibodies to IFITMs may offer novel therapeutic  
323 perspectives for the treatment of COVID-19.

324

## 325 **ACKNOWLEDGMENTS**

326 We thank Susanne Engelhart, Kerstin Regensburger, Martha Meyer, Regina Burger, Nicole Schrott,  
327 Daniela Krnavek for excellent technical assistance. The ACE2 vector and the SARS-CoV-2 S-HA  
328 plasmid were kindly provided by Shinji Makino and Stefan Pöhlmann. We thank Karl-Klaus  
329 Conzelmann and Stefan Pöhlmann for providing VSVΔG. This study was supported by DFG grants  
330 to F.K., J.Mün., K.M.J.S., D.Sa. (CRC 1279, SPP 1923, KM 5/1-1, SP1600/4-1), C.G. (GO2153/3-  
331 1) EU's Horizon 2020 research and innovation program to J.M. (Fight-nCoV, 101003555), as well  
332 as the BMBF to F.K., D.Sa. and K.M.J.S. (Restrict SARS-CoV-2, protACT and IMMUNOMOD).  
333 C.P.B., C.C., and R.G. are part of and R.G. is funded by a scholarship from the International Graduate  
334 School in Molecular Medicine Ulm (IGradU).

335

## 336 **AUTHOR CONTRIBUTIONS**

337 C.P.B. performed most experiments. R.N. performed experiments with infectious SARS-CoV-2  
338 assisted by F.Z., M.V. performed PLA assays, R.G established methods. C.M.S. generated most  
339 expression constructs. T.W and L.W. provided the lentiviral pseudotypes while D.Sc. performed  
340 FACS for the Vpr-BlaM assay; E.B. and J.W. performed the HEK293T GFP split fusion assay. J.K.,  
341 S.H. and A.K. provided, cultured and stimulated gut organoids. L.K. helped with the microscopy  
342 analysis of the organoids. C.S. and C.C. performed the experiment in HEK293T cells stably  
343 expressing IFITMs. J. Mül., C.C. and J. Mün provided SARS-CoV-2 virus. C.S. and S.St. performed  
344 assays in stable IFITM expressing HEK293T. R.G., K.S. and S.S. provided resources. D.Sa., J. Mün  
345 and C.G. provided additional resources and comments for the manuscript. K.M.J.S and F.K.  
346 conceived the study, planned experiments and wrote the manuscript. All authors reviewed and  
347 approved the manuscript.

348 **DECLARATIONS OF INTERESTS**

349 The authors declare no competing interests.

350

351 **FIGURE LEGENDS**

352 **Figure 1. IFITM1, 2 and 3 prevent SARS-CoV-2 S mediated pseudoparticle infection.**

353 (A) Schematic depiction of the assay to assess VSVpp entry.

354 (B) Quantification of VSV(luc) $\Delta$ G\*SARS-CoV-2-S entry by luciferase activity in HEK293T cells  
355 transiently expressing the indicated proteins and infected 24 h post-transfection with VSV(luc)  
356  $\Delta$ G\*SARS-CoV-2-S (MOI 0.025) for 16 h. Bars represent means of  $n=3\pm$ SEM. Lower panel:  
357 Immunoblot of the corresponding whole cell lysates (WCLs) stained with anti-IFITM1, anti-IFITM2,  
358 anti-IFITM3, anti-PSGL-1, anti ACE2 and anti-actin.

359 (C) Quantification of VSV(luc)  $\Delta$ G\*SARS-CoV-2-S entry by luciferase activity in HEK293T cells  
360 transiently transfected with indicated expression vectors and transduced 24 h post-transfection with  
361 HIV(luc) $\Delta$ env\*-SARS-CoV-2 S for 48 h. All bar diagrams in this figure represent means of  $n=3$   
362 ( $\pm$ SEM).

363 (D) Schematic depiction of the assay to assess the effects of IFITMs in the producer cells on SARS-  
364 CoV-2 S VSVpp production and infectivity.

365 (E) Quantification of VSV(luc)  $\Delta$ G\*SARS-CoV-2-S particle infectivity by luciferase activity in  
366 Caco-2 cells infected with the supernatant of HEK293T cells transiently transfected with SARS-  
367 CoV-2 Spike and indicated expression vectors. Bars represent means of  $n=3\pm$ SEM.

368 (F) Transduction of Calu-3 cells treated with non-targeting (CTRL) or IFITM1, 2 or 3 siRNAs or a  
369 combination thereof with VSV(luc)  $\Delta$ G\*SARS-CoV-2-S particles. Transductions efficiencies were  
370 determined as described in panel B.

371 See also Figure S1.



372 **Figure 2. IFITMs prevent SARS-CoV-2 Spike and ACE2 mediated fusion and attachment.**

373 (A) Split-GFP assay measuring cell-cell fusion. GFP1-10 and SARS-CoV-2 Spike expressing  
374 HEK293T were co-cultured with GFP11, ACE2 and IFITM expressing HEK293T. Quantification of  
375 successful fusion by GFP positive cells (green) normalized to nuclei (left panel). Bars represent  
376 means of  $n=3\pm$ SEM. Exemplary fluorescence images (right panel).

377 (B) Fusion of HIV(Vpr-Blam) $\Delta$ env\*-SARS-CoV-2-S with HEK293T cells transiently expressing  
378 ACE2 and IFITMs. Quantification of the fusion efficiency by flow cytometry as percentage of  
379 (cleaved CCF2)+ cells. Bars represent means of  $n=2(3$  technical replicates each) $\pm$ SEM. Right panel:  
380 Exemplary gating of the raw data.

381 (C) Proximity Ligation assay between SARS-CoV-2 Spike and ACE2 in Calu-3 depleted of IFITM1,  
382 IFITM2 or IFITM3 were infected with pseudotyped S CoV-2 VSV. Lines represent means of  $n=2$   
383 (60-100 cells)  $\pm$ SEM. DAPI (blue), nuclei. PLA signal (yellow). Scale bar, 20  $\mu$ m.

384 (D) Quantification of the entry of VSV(luc) $\Delta$ G pseudotyped with indicated spike proteins (SARS-  
385 CoV-2, SARS-CoV, RaTG13-CoV, Pang-CoV) by luciferase activity in HEK293T cells transiently  
386 expressing indicated proteins and infected 24h post transfection with pseudoparticles (MOI 0.025)  
387 for 16 h. Bars represent means of  $n=3\pm$ SEM.

388 See also Figure S2.

389  
390 **Figure 3. Effect of IFITM overexpression on SARS-CoV-2 infection and IFITM expression**  
391 **levels in primary cells.**

392 (A) Quantification of viral N gene RNA by qRT-PCR in the supernatant of HEK293T 48 h post  
393 infection with SARS-CoV-2 (MOI 0.05). Cells transiently express indicated proteins. Lower panel:  
394 Immunoblots of whole cell lysates stained with anti-SARS-CoV-2-Spike, anti-IFITM1, anti-  
395 IFITM2/3, anti-PSGL-1, anti-ACE2 and anti-actin. Bars represent means of  $n=3\pm$ SEM.

396 (B) Expression of IFITM1, IFITM2 and IFITM3 after stimulation with IFN- $\alpha$ 2 (500 U/ml, 72 h),  
397 IFN- $\beta$  (500 U/ml, 72 h) or IFN- $\gamma$  (200 U/ml, 72 h) in Calu-3 cells, primary bronchial epithelial cells  
398 (NHBE) or stem cell derived gut organoids. Immunoblot of whole cell lysates stained with anti-  
399 IFITM1, anti-IFITM2, anti-IFITM3 and anti-actin.

400 (C) Immunofluorescence images of stem cell derived gut organoids treated as in (B). Cells were  
401 stained with anti-IFITM1,2 or 3 (green) or E-Cadherin (green). Nuclei, DAPI (blue). Scale bar, 20  
402  $\mu$ m.

403 See also Figure S3.

404

#### 405 **Figure 4: Endogenous IFITMs promote SARS-CoV-2 replication and entry**

406 (A, B) Quantification of viral N gene RNA by qRT-PCR in Calu-3 cells 6 h post infection with SARS-  
407 CoV-2 (MOI 0.05). Values were normalized to GAPDH and calculated relative to the control (set to  
408 100%). Cells were transiently transfected with siRNA either control (CTRL) or targeting IFITM1,  
409 2, 3 (1, 2, 3) as indicated. Additionally, cells were either treated with IFN- $\beta$  or left untreated. Bars  
410 represent means of  $n=2\pm$ SEM.

411 (C, D) Quantification of viral N gene RNA by qRT-PCR in the supernatant of Calu-3 48 h post  
412 infection with SARS-CoV-2 (MOI 0.05). Cells were transiently transfected with siRNA either control  
413 (si.NT) or targeting IFITM1, 2 and 3 as indicated. Additionally, cells were either treated with IFN- $\beta$   
414 or left untreated. Bars represent means of  $n=4\pm$ SEM.

415 (E) Proximity ligation assay between SARS-CoV-2 S and IFITM1, IFITM2 or IFITM3 in Calu-3  
416 cells infected with SARS-CoV-2 for 2 h at 4°C. Line represent means of  $n=(60-100 \text{ cells})\pm$ SEM.  
417 DAPI(Blue), nuclei. PLA signal (yellow). Scale bar, 20  $\mu$ m.

418 See also Figure S4.

419

420 **STAR METHODS**

421

422 **KEY RESOURCES TABLE**

| REAGENT or RESOURCE                                      | SOURCE                                       | IDENTIFIER            |
|----------------------------------------------------------|----------------------------------------------|-----------------------|
| <b>Antibodies</b>                                        |                                              |                       |
| IRDye 680RD Goat anti-Rabbit IgG (H + L)<br>(1 to 20000) | LI-COR                                       | Cat# 926-68071        |
| IRDye 800CW Goat anti-Mouse IgG (H + L)<br>(1 to 20000)  | LI-COR                                       | Cat# 926-32210        |
| IRDye 800RD Goat anti-Rat IgG (H + L)<br>(1 to 20000)    | LI-COR                                       | Cat# 925-32219        |
| Rabbit polyclonal anti-IFITM1                            | Abcam                                        | Cat# ab233545         |
| Rabbit polyclonal anti-IFITM2                            | Abcam                                        | Cat#ab236735          |
| Rabbit polyclonal anti-IFITM3                            | Cell signalling                              | Cat#59212             |
| Rabbit polyclonal anti-ACE2                              | Abcam                                        | Cat# sc-166755        |
| Rabbit polyclonal anti-PSGL-1                            | Abcam                                        | Cat#134243            |
| Mouse monoclonal anti VSV-M                              | Absoulte Antibody                            | Cat# Ab01404-2.0      |
| SARS-CoV-2 (COVID-19) spike antibody [1A9]               | Biozol                                       | Cat#GTX-<br>GTX632604 |
| Rabbit polyclonal anti-beta Actin (1 to 1000)            | abcam                                        | Cat# ab8227           |
| <b>Bacterial and Virus strains</b>                       |                                              |                       |
| VSVΔG(luc)*VSV-G                                         | Gert Zimmer<br>(Rentsch and<br>Zimmer, 2011) | N/A                   |
| VSVΔG(GFP)*VSV-G                                         | Karl-Klaus<br>Conzelmann,                    | N/A                   |
| BetaCoV/Netherlands/01/NL/2020                           | European Virus<br>Archive                    | #010V-03903           |
| BetaCoV/ France/IDF0372/2020                             | European Virus<br>Archive                    | #014V-03890           |
| <b>Chemicals, Peptides, and Recombinant Proteins</b>     |                                              |                       |
| L-Glutamine                                              | Pan Biotech                                  | Cat# P04-80100        |
| Dulbecco's Modified Eagle Medium (DMEM)                  | Gibco                                        | Cat#41965039          |
| Minimum Essential Medium Eagle (MEM)                     | Sigma-Aldrich                                | Cat#M4655             |
| Opti-MEM                                                 | Gibco                                        | Cat# M3942            |
| Roswell Park Memorial Institute (RPMI)                   | Gibco                                        | Cat# 22400089         |
| Penicillin-Streptomycin                                  | ThermoFisher                                 | Cat# 15140122         |
| non-essential amino acids                                | Sigma-Aldrich                                | Cat# M7145            |
| Sodium pyruvate                                          | Sigma-Aldrich                                | Cat# S8636            |
| FCS                                                      | Gibco                                        | Cat#10270106          |
| Trypsin EDTA                                             | Gibco                                        | Cat# T3924            |
| TMB peroxidase substrate (Sure blue)                     | Medac                                        | Cat# 52-00-04         |
| Crystal violet                                           | Sigma-Aldrich                                | Cat# C0775            |
| Avicel                                                   | FMC Corporation                              | Cat# RC-581           |

|                                                                                                                             |                    |                  |
|-----------------------------------------------------------------------------------------------------------------------------|--------------------|------------------|
| hESC Matrigel                                                                                                               | Corning            | Cat#354277       |
| TrypLE Express                                                                                                              | Invitrogen         | Cat#12605036     |
| Antibody diluent                                                                                                            | Zytomed            | Cat#ZUC025-100   |
| Fluoromount-G                                                                                                               | Southern Biotech   | Cat#0100-01      |
| NucRed Live 647 ReadyProbes Reagent                                                                                         | Invitrogen         | Cat#R37106       |
| Solution D                                                                                                                  | ThermoFisher       | Cat# K1156       |
| Loading kit with CCF2-AM                                                                                                    | ThermoFisher       | Cat#K1032        |
| Lipofectamine RNAiMAX                                                                                                       | ThermoFisher       | Cat# 13778075    |
| Luciferase Assay Kit                                                                                                        | Promega            | Cat# E1500       |
| Hoechst 33342                                                                                                               | Invitrogen         | Cat#62249        |
| Q5 Site-Directed Mutagenesis Kit                                                                                            | NEB                | Cat# E0554       |
| TaqMan Fast Virus 1-Step Master Mix                                                                                         | ThermoFisher       | Cat# 4444436     |
| Duolink In Situ Detection Reagents FarRed                                                                                   | Sigma-Aldrich      | Cat#DOU92013     |
| GAPD (GAPDH) Endogenous Control                                                                                             | ThermoFisher       | Cat#4352338E     |
| $\beta$ -mercaptoethanol                                                                                                    | Sigma-Aldrich      | Cat# 444203      |
| Immobilon-FL PVDF membranes                                                                                                 | Merck Millipore    | Cat#IPVH00010    |
| Paraformaldehyde                                                                                                            | Merck, Darmstadt   | Cat# 104005      |
| TransIT-LT1                                                                                                                 | Mirus              | Cat#MIR2300      |
| NuPAGE 4 $\pm$ 12% Bis-Tris Gels                                                                                            | ThermoFisher       | Cat# NP0321BOX   |
| Synthetic SARS-CoV-2-RNA                                                                                                    | Twist Bioscience   | Cat# 102019      |
| RNAiMAX                                                                                                                     | ThermoFisher       | Cat# LMRNA015    |
| Recombinant IFN- $\alpha$ 2                                                                                                 | pbl assay science  | Cat# 11101-1     |
| Recombinant IFN- $\beta$                                                                                                    | R&D systems        | Cat# 8499-IF-010 |
| Recombinant IFN- $\gamma$                                                                                                   | Sigma-Aldrich      | Cat# I3265       |
| Agarose                                                                                                                     | Sigma-Aldrich      | Cat#A9539        |
| Poly-L-Lysine Solution                                                                                                      | Merck, Darmstadt   | Cat# A005C       |
| Experimental Models: Cell Lines                                                                                             |                    |                  |
| Human: Calu-3                                                                                                               | Manfred Frick      | N/A              |
| Human: Caco-2                                                                                                               | Holger Barth       | N/A              |
| Human: HeLa                                                                                                                 | ATCC               | Cat# CRM-CCL-2   |
| Hybridoma cells                                                                                                             | ATCC               | CRL-2700         |
| Human: HEK293T GFP1-10 and GFP11 split                                                                                      | Olivier Schwarz    | N/A              |
| African Green Monkey: Vero E6                                                                                               | ATCC               | Cat# CRL-1586    |
| Human: Normal Human Bronchial Epithelial cells (NHBE)                                                                       | Lonza              | Cat# CC-2540     |
| Human: Embryonic Stem Cell (hESC) line HUES8                                                                                | Harvard University | N/A              |
| Oligonucleotides                                                                                                            |                    |                  |
| XbaI_forward:<br>CGTCTAGAGCCACCATG                                                                                          | This paper         | N/A              |
| XbaI_nCoV-2_S_Forward:<br>CGTCTAGAATGTTTCTGCTGACCACCAAGC<br>GGACCATG                                                        | This paper         | N/A              |
| nCoV-2_S_V5_MluI_reverse:<br>GCACGCGTCTACGTAGAATCGAGACCGAGG<br>AGAGGGTTAGGGATAGGCTTACCACAGAA<br>CCGGTGTAGTGCAGTTTCACGCCCTTC | This paper         | N/A              |

|                                                                          |                 |                |
|--------------------------------------------------------------------------|-----------------|----------------|
| Pangolin-S_MluI_reverse:<br>GCACGCGTCTCAATTTTCCGTTTGAGGGTAA<br>AACACAGAG | This paper      | N/A            |
| RaTG13-S_MluI_reverse:<br>CGACGCGTCTAGGTGTAGTGCAGCTTCACG                 | This paper      | N/A            |
| IFI1_K122A_forward:<br>AATACAGGAAGCCCGGGGTTACTACCCATA<br>CG              | This paper      | N/A            |
| IFI1_K122A_reverse:<br>ATCTGTAACATAATATGGTAGACTG                         | This paper      | N/A            |
| CTRL siRNA-01:<br>UAAGGCUAUGAAGAGAUAC                                    | This paper      | D-001206-14-20 |
| CTRL siRNA-02:<br>AUGUAUUGGCCUGUAUUAG                                    | This paper      | D-001206-14-21 |
| CTRL siRNA-03:<br>AUGAACGUGAAUUGCUCUAA                                   | This paper      | D-001206-14-22 |
| CTRL siRNA-04:<br>UGGUUUACAUGUCGACUAA                                    | This paper      | D-001206-14-23 |
| siRNA IFITM2-01:<br>CAAACCUUCUCUCCUGUCA                                  | Dharmacon       | D-020103-01    |
| siRNA IFITM2-02:<br>UCAAGGAGGAGCAGGAAGU                                  | Dharmacon       | D-020103-02    |
| siRNA IFITM2-03:<br>UCGUCCAGGCCAGCGUAU                                   | Dharmacon       | D-020103-03    |
| siRNA IFITM2-04:<br>UGGUCUGGUCCUGUUCUAA                                  | Dharmacon       | D-020103-18    |
| siRNA IFITM3-01:<br>ACGUGUUUCUGGUGCUAAA                                  | Dharmacon       | D-014116-13    |
| siRNA IFITM3-02:<br>AUGGAUAGAUCAGGAGGCA                                  | Dharmacon       | D-014116-14    |
| siRNA IFITM3-03:<br>UGCUGAUCUCCAGGCCUA                                   | Dharmacon       | D-014116-15    |
| siRNA IFITM3-04:<br>UCGUCAUCCAGUGCUGAU                                   | Dharmacon       | D-014116-16    |
| HKU-NF forward:<br>TAATCAGACAAGGAACTGATTA                                | Biomers         | N/A            |
| HKU-N reverse:<br>CGAAGGTGTGACTTCCAT G                                   | Biomers         | N/A            |
| HKU-N Probe:<br>FAM-GCAAATTGTGCAATTTGCGG-TAMRA                           | Biomers         | N/A            |
| <b>Recombinant DNA</b>                                                   |                 |                |
| pCG IFITM1                                                               | This paper      | N/A            |
| pCG IFITM2                                                               | This paper      | N/A            |
| pCG IFITM3                                                               | This paper      | N/A            |
| pCG IFITM1-IRES eGFP                                                     | This paper      | N/A            |
| pCG IFITM2-IRES eGFP                                                     | This paper      | N/A            |
| pCG IFITM3-IRES BFP                                                      | This paper      | N/A            |
| pQCXIP IFITM1                                                            | Stephen Elledge | N/A            |

|                                                        |                                                           |                                                                     |
|--------------------------------------------------------|-----------------------------------------------------------|---------------------------------------------------------------------|
| pQCXIP IFITM2                                          | Stephen Elledge<br>(Huang et al., 2011)                   | N/A                                                                 |
| pQCXIP IFITM3                                          | Stephen Elledge                                           | N/A                                                                 |
| pQCXIP IFITM1-HA                                       | This paper                                                | N/A                                                                 |
| pQCXIP IFITM2-HA                                       | This paper                                                | N/A                                                                 |
| pQCXIP IFITM3-HA                                       | This paper                                                | N/A                                                                 |
| pQCXIP IFITM1 $\Delta$ palm (C 50, 51, 84 A)-HA        | This paper                                                | N/A                                                                 |
| pQCXIP IFITM2 $\Delta$ palm (C 70, 72, 104 A)-HA       | This paper                                                | N/A                                                                 |
| pQCXIP IFITM3 $\Delta$ palm (C 71, 72, 105 A)-HA       | This paper                                                | N/A                                                                 |
| pQCXIP IFITM1 $\Delta$ ubi (K 3, 62, 67, 83A)-HA       | This paper                                                | N/A                                                                 |
| pQCXIP IFITM2 $\Delta$ ubi (K 23, 82, 87, 103 A)-HA    | This paper                                                | N/A                                                                 |
| pQCXIP IFITM3 $\Delta$ ubi (K 24, 83, 88, 104 A)-HA    | This paper                                                | N/A                                                                 |
| pQCXIP IFITM1 $\Delta$ ubi (K 3, 62, 67, 83, 122 A)-HA | This paper                                                | N/A                                                                 |
| pCG_SARS-CoV2-Spike-IRES_eGFP                          | Stefan Pöhlmann(Hoffmann et al., 2020a)                   | N/A                                                                 |
| pCG SARS-CoV2-Spike C-V5-IRES_eGFP                     | This paper                                                | N/A                                                                 |
| pCG Pangolin CoV- spike (humanized)                    | This paper                                                | N/A                                                                 |
| pCG_batCoV-RaTG13-spike-IRES_eGFP(humanized)           | This paper                                                | N/A                                                                 |
| pCG SARS-CoV-1-S-IRES_eGFP(humanized)                  | Michael Schindler                                         | N/A                                                                 |
| pLV-EF1a-human ACE2-IRES-puro                          | This paper                                                | N/A                                                                 |
| pCMV4-BlaM-Vpr                                         | Addgene                                                   | Cat# 21950                                                          |
| pTargeT-hACE2                                          | Shuetsu Fukushi and Masayuki Saijo (Fukushi et al., 2005) | Cat#16033974                                                        |
| pLV-EF1a-IRES-Puro                                     | Addgene                                                   | Cat# 85132                                                          |
| pCX4bsrACE2                                            | Shinji Makino (Kamitani et al., 2006)                     | N/A                                                                 |
| <b>Software and Algorithms</b>                         |                                                           |                                                                     |
| Corel DRAW 2017                                        | Corel Corporation                                         | <a href="https://www.coreldraw.com/">https://www.coreldraw.com/</a> |
| GraphPad Prism Version 8                               | GraphPad Software, Inc.                                   | <a href="https://www.graphpad.com">https://www.graphpad.com</a>     |
| LI-COR Image Studio Lite Version 5.0                   | LI-COR                                                    | <a href="http://www.licor.com/">www.licor.com/</a>                  |
| Fiji (Image J) version 1.8                             | Java                                                      | <a href="http://www.imagej.nih.gov/ij">www.imagej.nih.gov/ij</a>    |

423

424

## 425 CONTACT FOR REAGENT AND RESOURCE SHARING

### 426 Lead contact

427 Further information and requests for resources and reagents should be directed to and will be fulfilled  
428 by the Lead Contacts, Konstantin Sparrer ([konstantin.sparrer@uni-ulm.de](mailto:konstantin.sparrer@uni-ulm.de)) and Frank Kirchhoff  
429 ([frank.kirchhoff@uni-ulm.de](mailto:frank.kirchhoff@uni-ulm.de)).

430

### 431 Materials Availability

432 All unique reagents generated in this study are listed in the Key Resources Table and available from  
433 the Lead Contacts.

434

## 435 EXPERIMENTAL MODEL AND SUBJECT DETAILS

436 **Cell lines.** All cells were cultured at 37°C in a 5% CO<sub>2</sub> atmosphere. HEK293T and HeLa cells were  
437 maintained in Dulbecco's Modified Eagle Medium (DMEM) supplemented with 10% heat-  
438 inactivated fetal calf serum (FCS), L-glutamine (2 mM), streptomycin (100 µg/ml) and penicillin  
439 (100 U/ml). HEK293T and HeLa cells were provided and authenticated by the ATCC. Caco-2  
440 (human epithelial colorectal adenocarcinoma) cells were maintained in DMEM containing 10% FCS,  
441 glutamine (2 mM), streptomycin (100 µg/ml) and penicillin (100 U/ml) and NEAA supplement (Non-  
442 essential amino acids (10%)), sodium Pyruvate (10%). Calu-3 (human epithelial lung  
443 adenocarcinoma) cells were cultured in Minimum Essential Medium Eagle (MEM) supplemented  
444 with 10% FCS (during viral infection) or 20% (during all other times), penicillin (100 µg/ml),  
445 streptomycin (100 µg/ml), 1 mM sodium pyruvate, and NEAA supplement (Non-essential amino  
446 acids (10%)). Hybridoma cells were cultured in Roswell Park Memorial Institute (RPMI) 1640  
447 medium supplemented with 10% fetal calf serum (FCS), L-glutamine (2 mM), streptomycin (100  
448 µg/ml) and penicillin (100 U/ml). Monoclonal anti-VSV-G containing supernatant was aliquoted and  
449 stored at -20°C.

450  
451 **Primary cell cultures.** Human embryonic stem cell (hESC) line HUES8 (Harvard University) was  
452 used with permission from the Robert Koch Institute according to the “79. Genehmigung nach dem  
453 Stammzellgesetz, AZ 3.04.02/0084”. Cells were cultured on hESC Matrigel (Corning) in mTeSR1  
454 medium (Stemcell Technologies) at 5% CO<sub>2</sub>, 5% O<sub>2</sub>, and 37°C. Medium was changed every day  
455 and cells were splitted twice a week with TrypLE Express (Invitrogen). Experiments involving  
456 human stem cells were approved by the Robert-Koch-Institute (156. Genehmigung nach dem  
457 Stammzellgesetz Erteilt) on 29.04.2020. NHBE (primary human bronchial/tracheal epithelial) cells  
458 were grown in Bronchial Epithelial Cell Growth Basal Medium (BEGM) and Bronchial Epithelial  
459 Cell Growth Medium SingleQuotes Supplements and Growth Factors.

460  
461 **METHOD DETAILS**  
462 **Expression constructs.** pQCXIP with HA-tagged IFITM proteins was generated by adding an HA-  
463 tag to pQCXIP-IFITM1/2/3. Expression plasmids encoding for IFITM1, IFITM2 and IFITM3  
464 (pCG\_IFITM1, pCG\_IFITM2, pCG\_IFITM3 and pCG\_IFITM1-IRES\_eGFP, pCG\_IFITM2-  
465 IRES\_eGFP and pCG\_IFITM3-IRES\_BFP) were PCR amplified and subcloned in pCG and pCG-  
466 IRES-eGFP-backbones using flanking restriction sites XbaI and MluI from pQCXIP IFITM1-HA,  
467 pQCXIP IFITM2-HA, pQCXIP IFITM3-HA, that with pQCXIP IFITM1 $\Delta$ palm (C 50, 51, 84 A)-  
468 HA, pQCXIP IFITM2 $\Delta$ palm (C 70, 72, 104 A)-HA , pQCXIP IFITM3 $\Delta$ palm (C 71, 72, 105 A)-HA  
469 , pQCXIP IFITM1 $\Delta$ ubi (K 3, 62, 67, 83A)-HA , pQCXIP IFITM2 $\Delta$ ubi (K 23, 82, 87, 103 A)-HA  
470 and pQCXIP IFITM3 $\Delta$ ubi (K 24, 83, 88, 104 A)-HA. The pQCXIP IFITM mutant plasmids were  
471 generated using Q5 Site-Directed Mutagenesis Kit (NEB). pCG\_SARS-CoV-2-Spike-IRES\_eGFP  
472 (humanized), encoding the spike protein of SARS-CoV-2 isolate Wuhan-Hu-1, NCBI reference  
473 Sequence YP\_009724390.1, was kindly provided by Stefan Pöhlmann (German Primate Center,  
474 Göttingen, Germany) while pCG\_SARS-CoV2-Spike C-V5-IRES\_eGFP was PCR amplified and



475 subcloned using XbaI+MluI. Constructs coding SARS-CoV-S, Pangolin CoV-S were ordered at  
476 TwistBioscience or RaTG13-S at Baseclear and subcloned using XbaI+MluI into pCG-IRES\_eGFP  
477 backbone. To generate the pLV-EF1a-human ACE2-IRES-puro, pTarget-hACE2 was provided by  
478 Shuts Fukushi and Masayuki Saijo (National Institute of Infectious Diseases, Tokyo, Japan). The  
479 plasmid of human ACE2 was digested with MluI and SmaI and then the DNA fragment was inserted  
480 into the MluI-HpaI site of pLV-EF1a-IRES-Puro.

481  
482 **Pseudoparticle stock production.** To produce pseudotyped VSV(luc/GFP) $\Delta$ G particles, HEK293T  
483 cells were transfected with pCG\_SARS-CoV-2-Spike C-V5-IRES\_GFP, pCG\_SARS-CoV-Spike C-  
484 V5-IRES\_GFP, pCG\_Pangolin CoV-spike (humanized) or pCG\_batCoV-RaTG13-spike-  
485 IRES\_eGFP (humanized) using PEI (1 mg/mL) or pCG\_SARS-CoV-1 S-IRES\_eGFP (humanized)  
486 as previously described (Koepke et al., 2020). 24 hours post transfection, the cells were infected with  
487 VSV $\Delta$ G(GFP/luc)\*VSV-G at an MOI of 1. One hour post infection, the inoculum was removed.  
488 Pseudotyped particles were harvested twice at 16 h post infection. Cell debris were pelleted by  
489 centrifugation at 2000 rpm for 5 min. Residual input particles carrying VSV-G were blocked by  
490 adding 10 % (v/v) of I1 Hybridoma Supernatant (I1, mouse hybridoma supernatant from CRL-2700;  
491 ATCC) to the cell culture supernatant.

492 To produce pseudotyped HIV-1(fLuc) $\Delta$ env particles, HEK293T cells were transfected with  
493 pCMVdR8.91 and pSEW-luc2 or pCMV4-BlaM-vpr as well as pCG\_SARS-CoV-2-Spike C-V5-  
494 IRES\_eGFP using TransIT-LT1 according to the manufacturers protocol. Six hours post transfection,  
495 the medium was replaced with DMEM containing only 2.5% FCS. The particles were harvested  
496 48 hours post transfection. Cell debris were pelleted and removed by centrifugation at 2000 rpm  
497 for 5 min.

498

499 **Target cell assay.** HEK293T cells were transiently transfected using PEI (Koepke et al., 2020) with  
500 pLV-EF1a-human ACE2-IRES-puro and pCG-IFITM1-IRES\_eGFP or pCG-IFITM2-IRES\_eGFP  
501 or pCG-IFITM3-IRES\_BFP. 24h post transfection the cells were transduced/infected with HIV-  
502 1Δenv(fLuc)\* SARS-CoV-2 S or VSV(luc)ΔG\*SARS-CoV-2 S particles. 16h post infection the cells  
503 were lysed in 300μl of Luciferase Lysis buffer (Promega) and firefly luciferase activity was  
504 determined using the Luciferase Assay Kit (Promega) according to the manufacturer's instructions  
505 on an Orion microplate luminometer (Berthold).

506  
507 **Producer cell assay.** HEK293T cells were transiently transfected using PEI (Koepke et al., 2020)  
508 with pCG\_IFITM1\_IRES\_eGFP, pCG\_IFITM2-IRES\_eGFP, pCG\_IFITM3-IRES\_BFP or  
509 pCG\_SARS-CoV-2-Spike-C-V5-IRES\_eGFP. 24 h post transfection cells were infected with  
510 VSV(GFP)ΔG\*SARS-CoV-2 S or VSV(GFP)ΔG\*VSV-G with a MOI of 1. After 1 hour, the  
511 inoculum was removed and medium was replaced. 16h post infection, cells were harvested to  
512 generate cell lysates. The supernatant was collected separately and supplemented with 10 % (v/v) of  
513 I1 Hybridoma Supernatant. Blocked supernatants were used to infect Caco-2 cells. 16h post infection  
514 medium was removed and cells were washed with PBS, detached with Trypsin-EDTA (Gibco) and  
515 fixed with 2% PFA for 30 min at 4°C. GFP-positive cells were analysed by flow cytometry (BD  
516 Canto II and FlowJo).

517  
518 **Luciferase assay.** To determine viral gene expression, the supernatant of transfected cells was  
519 removed 16 h and 48 h post infection and the cells lysed in 300μl of Luciferase Lysis buffer  
520 (Luciferase Cell Culture Lysis, Promega). 16h post infection, and firefly luciferase activity was  
521 determined using the Luciferase Assay Kit (Luciferase Cell Culture, Promega) according to the  
522 manufacturer's instructions on an Orion microplate luminometer (Berthold).

523

524 **Vpr-BlaM fusion assay.** HEK293T cells were seeded and transiently transfected using PEI (Koepke  
525 et al., 2020) with pLV-EF1a-human\_ACE2-IRES-puro and pCG\_IFITM1, pCG\_IFITM2 or  
526 pCG\_IFITM3. 24 hours post transfection, cells were transferred to a 96-well plate. On the next day,  
527 cells were infected with 50 $\mu$ l HIV-1  $\Delta$ env (BlaM-Vpr)-\*SARS-CoV-2-S particles for 2.5 h at 37 °C,  
528 followed by washing with PBS. Cells were detached and stained with CCF2/AM (1 mM) as  
529 previously described(Cavrois et al., 2002). Finally, cells were washed and fixed with 4% PFA. The  
530 change in emission fluorescence of CCF2 after cleavage by the BlaM-Vpr chimera was monitored  
531 by flow cytometry using a FACSCanto II (BD).

532  
533 **IFITM expressing HEK293T cells assay.** HEK293T cells were stably transduced with ACE2  
534 (pCX4bsrACE2) and indicated IFITM-HA (pQCXIP) constructs. Upon selection with blasticidin and  
535 puromycin and confirmation of ACE2 and IFITM-HA expression by flow cytometry, cells were  
536 transduced with lentiviral particles pseudotyped with C-terminally HA-tagged SARS-CoV-2 spike  
537 and expressing luciferase. Luminometric measurement occurred 48 hours post transduction.

538  
539 **SARS-CoV-2 virus stock production.** BetaCoV/Netherlands/01/NL/2020 or BetaCoV/  
540 France/IDF0372/2020 was propagated on Vero E6 infected at an MOI of 0.003 in serum-free medium  
541 containing 1  $\mu$ g/ml trypsin as previously described (Nchioua et al., 2020). Briefly, the cells were  
542 inoculated for 2 h at 37°C before the inoculum was removed. The supernatant was harvested 48 h  
543 post infection upon visible cytopathic effect (CPE). To remove the debris, the supernatants were  
544 centrifuged for 5 min at 1,000  $\times$  g, then aliquoted and stored at -80°C. Infectious virus titre was  
545 determined as plaque forming units (PFU). N gene RNA copies were determined by RT-qPCR.

546

547 **Plaque-forming Unit Assay.** The plaque-forming unit (PFU) assay was performed as previously  
548 described (Nchioua et al., 2020). SARS-CoV-2 stocks were serially diluted and confluent monolayers  
549 of Vero E6 cells infected. After incubation for 1 to 3 h at 37°C with shaking every 15 to 30 min. The  
550 cells were overlaid with 1.5 ml of 0.8 % Avicel RC-581 (FMC) in medium and incubated for 3 days.  
551 Cells were fixed with 4 % paraformaldehyde (PFA) at room temperature for 45 min. After the cells  
552 were washed with PBS once 0.5 ml of staining solution (0.5 % crystal violet and 0.1 % triton in  
553 water). After 20 min incubation at room temperature, the staining solution was removed using water,  
554 virus-induced plaque formation quantified, and PFU per ml calculated.

555  
556 **qRT-PCR.** N (nucleoprotein) RNA levels were determined in supernatants or cells collected from  
557 SARS-CoV-2 infected HEK293T or Calu-3 cells 6 h, 24 h or 48 h post-infection. Total RNA was  
558 isolated using the Viral RNA Mini Kit (Qiagen) according to the manufacturer's instructions. RT-  
559 qPCR was performed according to the manufacturer's instructions using TaqMan Fast Virus 1-Step  
560 Master Mix (Thermo Fisher) and a OneStepPlus Real-Time PCR System (96-well format, fast mode).  
561 Primers were purchased from Biomers and dissolved in RNase free water. Synthetic SARS-CoV-2-  
562 RNA (Twist Bioscience) were used as a quantitative standard to obtain viral copy numbers. All  
563 reactions were run in duplicates. (Forward primer (HKU-NF): 5'-TAA TCA GAC AAG GAA CTG  
564 ATT A-3'; Reverse primer (HKU-NR): 5'-CGA AGG TGT GAC TTC CAT G-3'; Probe (HKU-NP):  
565 5'-FAM-GCA AAT TGT GCA ATT TGC GG-TAMRA). GAPDH primer/probe sets (Thermo  
566 Fisher) were used for normalization of cellular RNA levels.

567  
568 **IFITM1, 2 and 3 knockdown.** 24 h and 96 h post-seeding cells were transfected with 20 µM twice  
569 (Calu-3) or once 24 h post seeding with 40 µM (HeLa cells) of either non-targeting siRNA or IFITM1,  
570 IFITM2 or IFITM3 specific siRNA were transfected using Lipofectamine RNAiMAX (Thermo

571 Fisher) according to the manufacturer's instructions. Prior to transfection, the medium was changed.  
572 14 h post transfection, the medium was replaced with 1 ml MEM supplemented with 500 U/ml IFN-  
573  $\beta$  7 h post transfection, the Calu-3 cells were infected with SARS-CoV-2 (MOI 0.05) and 7 to 9 h  
574 later, supernatant was removed, and 1 ml fresh medium was added. 48h post infection cells and  
575 supernatants were harvested for Western blot and qPCR analysis respectively.

576  
577 **Calu-3, NHBE or gut organoid stimulation.** Calu-3 and NHBE cells were seeded in 12 well plates.  
578 HUES88 were seeded in 24-well-plates were coated with growth factor reduced (GFR) Matrigel  
579 (Corning) and in mTeSR1 with 10  $\mu$ M Y-27632 (Stemcell technologies). The next day,  
580 differentiation to organoids was started at 80-90% confluency as previously described (Krüger et al.,  
581 2020). Cells or organoids were stimulated with IFN- $\alpha$ 2 (500 U/ml), IFN- $\beta$  (500 U/ml), IFN- $\gamma$  (200  
582 U/ml). 3 days post stimulation whole cell lysates were generated.

583  
584 **Immunofluorescence of gut organoids.** For histological examination, organoids were fixed in 4 %  
585 PFA over night at 4°C, washed with PBS, and pre-embedded in 2 % agarose (Sigma) in PBS. After  
586 serial dehydration, intestinal organoids were embedded in paraffin, sectioned at 4  $\mu$ m, deparaffinized,  
587 rehydrated and subjected to heat mediated antigen retrieval in tris Buffer (pH 9) or citrate buffer (pH  
588 6). Sections were permeabilized with 0.5 % Triton-X for 30 min at RT and stained over night with  
589 primary antibodies (rabbit anti-IFITM1 1:500 or rabbit anti-IFITM2 1:500 or rabbit anti-IFITM3  
590 1:250) diluted in antibody diluent (Zytomed) in a wet chamber at 4°C. After washing with PBS-T,  
591 slides were incubated with secondary antibodies (Alexa Fluor IgG H+L, Invitrogen, 1:500) and 500  
592 ng/ml DAPI in Antibody Diluent for 90 min in a wet chamber at RT. After washing with PBS-T and  
593 water, slides were mounted with Fluoromount-G (Southern Biotech). Negative controls were  
594 performed using IgG controls or irrelevant polyclonal serum for polyclonal antibodies, respectively.  
595 Images were acquired using a LSM 710 system.

596

597 **GFP Split fusion assay.** GFP1-10 and GFP11-expressing HEK293T cells were seeded separately at  
598 a density of 80.000 cells per well of a 24-well plate. One day post seeding, cells were transiently  
599 transfected using the calcium-phosphate precipitation method (Chen and Okayama, 1987). GFP1-10  
600 cells were co-transfected with increasing amounts (0, 8, 16, 32, 64, 125, 250, 500 ng) of pCG\_IFTM1,  
601 pCG\_IFITM2, pCG\_IFITM3 and 250 ng of pLV-EF1a-human ACE2-IRES-puro. GFP11 cells were  
602 transfected with 250 ng of pCG\_SARS-CoV-2-Spike C-V5 codon optimised. 16 h post transfection,  
603 GFP1-10 and GFP11 cells were co-cultured in poly-L-lysine-coated 24-well plate. 24 h post co-  
604 culturing, cells were fixed with 4 % PFA and cell nuclei were stained using NucRed Live 647  
605 ReadyProbes Reagent (Invitrogen) according to the manufacturer's instructions. Fluorescence  
606 imaging of GFP and NucRed was performed using a Cytation3 imaging reader (BioTek Instruments).  
607 12 images per well were recorded automatically using the NucRed signal for autofocusing. The GFP  
608 area was quantified using a macro for ImageJ.

609

610 **Whole cell lysates.** To determine expression of cellular and viral proteins, cells were washed in PBS  
611 and subsequently lysed in Western blot lysis buffer (150 mM NaCl, 50 mM HEPES, 5 mM EDTA,  
612 0.1% NP40, 500  $\mu$ M Na<sub>3</sub>VO<sub>4</sub>, 500  $\mu$ M NaF, pH 7.5) supplemented with protease inhibitor (1:500,  
613 Roche) as previously described (Koepke et al., 2020). After 5 min of incubation on ice, the samples  
614 were centrifuged (4°C, 20 min, 14.000 rpm) to remove cell debris. The supernatant was transferred  
615 to a fresh tube, the protein concentration was measured and adjusted using Western blot lysis buffer.

616

617 **SDS-PAGE and Immunoblotting.** Western blotting was performed as previously described  
618 (Koepke et al., 2020). In brief, whole cell lysates were mixed with 4x or 6x Protein Sample Loading  
619 Buffer (LI-COR, at a final dilution of 1x) supplemented with 10 %  $\beta$ -mercaptoethanol (Sigma  
620 Aldrich), heated at 95°C for 5 min, separated on NuPAGE 4±12% Bis-Tris Gels (Invitrogen) for 90

621 minutes at 100 V and blotted onto Immobilon-FL PVDF membranes (Merck Millipore). The transfer  
622 was performed a constant voltage of 30 V for 30 minutes. After the transfer, the membrane was  
623 blocked in 1 % Casein in PBS (Thermo Scientific). Proteins were stained using primary antibodies  
624 against IFITM1 (1:1000), IFITM2 (1:1000), IFITM3 (1:1000) SARS Spike CoV-2 (1:1000), VSV-  
625 M (1:1000),  $\beta$ -actin (1:5000 Abcam), ACE2 (1:1000) and Infrared Dye labelled secondary antibodies  
626 (LI-COR IRDye). Band intensities were quantified using Image Studio (LI-COR).

627  
628 **Proximity Ligation Assay.** The proximity ligation assay (PLA) was performed as previously  
629 described (Volcic et al., 2020). In brief, HeLa or Calu-3 were seeded in a 24-well plate on a cover  
630 slip glass. 24 h post seeding the cells have been transfected once with 40  $\mu$ M either non-targeting  
631 siRNA or IFITM1 or IFITM3 siRNAs or and Calu-3 2 times with 20  $\mu$ M. 24h post transfection the  
632 cells were prechilled for 30 minutes at 4°C and then infected with VSV(luc) $\Delta$ G\*-SARS-CoV-2 S  
633 (MOI 2) or BetaCoV/ France/IDF0372/2020 (MOI 0.05) for 2 h on ice. The cells have been washed  
634 once with cold PBS and fixed with 4% PFA. Images were acquired on a Zeiss LSM 710 and  
635 processed using ImageJ (Fiji).

636  
637 **QUANTIFICATION AND STATISTICAL ANALYSIS**  
638 Statistical analyses were performed using GraphPad PRISM 8 (GraphPad Software). P-values were  
639 determined using a two-tailed Student's t test with Welch's correction. Unless otherwise stated, data  
640 are shown as the mean of at least three independent experiments  $\pm$  SEM. Significant differences are  
641 indicated as: \*,  $p < 0.05$ ; \*\*,  $p < 0.01$ ; \*\*\*,  $p < 0.001$ . Statistical parameters are specified in the figure  
642 legends.

643  
644

645 **REFERENCES**

- 646 Bailey, C.C., Zhong, G., Huang, I.-C., and Farzan, M. (2014). IFITM-Family Proteins: The Cell's  
647 First Line of Antiviral Defense. *Annu. Rev. Virol. 1*, 261–283.
- 648 Bermingham, A., Chand, M.A., Brown, C.S., Aarons, E., Tong, C., Langrish, C., Hoschler, K.,  
649 Brown, K., Galiano, M., Myers, R., et al. (2012). Severe respiratory illness caused by a novel  
650 coronavirus, in a patient transferred to the United Kingdom from the Middle East, September 2012.  
651 *Eurosurveillance 17*.
- 652 Blanco-Melo, D., Nilsson-Payant, B.E., Liu, W.-C., Uhl, S., Hoagland, D., Møller, R., Jordan, T.X.,  
653 Oishi, K., Panis, M., Sachs, D., et al. (2020). Imbalanced host response to SARS-CoV-2 drives  
654 development of COVID-19. *Cell*.
- 655 Cavrois, M., De Noronha, C., and Greene, W.C. (2002). A sensitive and specific enzyme-based assay  
656 detecting HIV-1 virion fusion in primary T lymphocytes. *Nat. Biotechnol.*
- 657 Chen, C., and Okayama, H. (1987). High-efficiency transformation of mammalian cells by plasmid  
658 DNA. *Mol. Cell. Biol. 7*, 2745–2752.
- 659 Chesarino, N.M., McMichael, T.M., and Yount, J.S. (2014). Regulation of the trafficking and  
660 antiviral activity of IFITM3 by post-translational modifications. *Future Microbiol. 9*, 1151–1163.
- 661 Diamond, M.S., and Farzan, M. (2013). The broad-spectrum antiviral functions of IFIT and IFITM  
662 proteins. *Nat. Rev. Immunol. 13*, 46–57.
- 663 Fu, Y., He, S., Waheed, A.A., Dabbagh, D., Zhou, Z., Trinité, B., Wang, Z., Yu, J., Wang, D., Li, F.,  
664 et al. (2020). PSGL-1 restricts HIV-1 infectivity by blocking virus particle attachment to target cells.  
665 *Proc. Natl. Acad. Sci. U. S. A. 117*, 9537–9545.
- 666 Fukushi, S., Mizutani, T., Saijo, M., Matsuyama, S., Miyajima, N., Taguchi, F., Itamura, S., Kurane,



- 667 I., and Morikawa, S. (2005). Vesicular stomatitis virus pseudotyped with severe acute respiratory  
668 syndrome coronavirus spike protein. *J. Gen. Virol.*
- 669 Guo, X., Steinkühler, J., Marin, M., Li, X., Lu, W., Dimova, R., and Melikyan, G.B. (2020).  
670 Interferon-Induced Transmembrane Protein 3 Blocks Fusion of Diverse Enveloped Viruses by  
671 Locally Altering Mechanical Properties of Cell Membranes. *BioRxiv* 2020.06.25.171280.
- 672 Hadjadj, J., Yatim, N., Barnabei, L., Corneau, A., Boussier, J., Smith, N., Péré, H., Charbit, B.,  
673 Bondet, V., Chenevier-Gobeaux, C., et al. (2020). Impaired type I interferon activity and  
674 inflammatory responses in severe COVID-19 patients. *Science*.
- 675 He, S., Hetrick, B., Dabbagh, D., Akhrymuk, I. V., Kehn-Hall, K., Freed, E.O., and Wu, Y. (2020).  
676 PSGL-1 blocks SARS-CoV-2 S protein-mediated virus attachment and infection of target cells. (Cold  
677 Spring Harbor Laboratory).
- 678 Hoffmann, M., Kleine-Weber, H., Schroeder, S., Krüger, N., Herrler, T., Erichsen, S., Schiergens,  
679 T.S., Herrler, G., Wu, N.-H., Nitsche, A., et al. (2020a). SARS-CoV-2 Cell Entry Depends on ACE2  
680 and TMPRSS2 and Is Blocked by a Clinically Proven Protease Inhibitor. *Cell*.
- 681 Hoffmann, M., Kleine-Weber, H., and Pöhlmann, S. (2020b). A Multibasic Cleavage Site in the Spike  
682 Protein of SARS-CoV-2 Is Essential for Infection of Human Lung Cells. *Mol. Cell* 78, 779-784.e5.
- 683 Huang, I.C., Bailey, C.C., Weyer, J.L., Radoshitzky, S.R., Becker, M.M., Chiang, J.J., Brass, A.L.,  
684 Ahmed, A.A., Chi, X., Dong, L., et al. (2011). Distinct patterns of IFITM-mediated restriction of  
685 filoviruses, SARS coronavirus, and influenza A virus. *PLoS Pathog.* 7.
- 686 Jia, R., Pan, Q., Ding, S., Rong, L., Liu, S.-L., Geng, Y., Qiao, W., and Liang, C. (2012). The N-  
687 Terminal Region of IFITM3 Modulates Its Antiviral Activity by Regulating IFITM3 Cellular  
688 Localization. *J. Virol.* 86, 13697–13707.

689 Kamitani, W., Narayanan, K., Huang, C., Lokugamage, K., Ikegami, T., Ito, N., Kubo, H., and  
690 Makino, S. (2006). Severe acute respiratory syndrome coronavirus nsp1 protein suppresses host gene  
691 expression by promoting host mRNA degradation. *Proc. Natl. Acad. Sci. U. S. A.*

692 Koepke, L., Winter, B., Grenzner, A., Regensburger, K., Engelhart, S., van der Merwe, J.A., Krebs,  
693 S., Blum, H., Kirchhoff, F., and Sparrer, K.M.J. (2020). An improved method for high-throughput  
694 quantification of autophagy in mammalian cells. *Sci. Rep. 10*, 1–20.

695 Krüger, J., Groß, R., Conzelmann, C., Müller, J.A., Koepke, L., Sparrer, K.M.J., Schütz, D.,  
696 Seufferlein, T., Barth, T.F.E., Stenger, S., et al. (2020). Remdesivir but not famotidine inhibits SARS-  
697 CoV-2 replication in human pluripotent stem cell-derived intestinal organoids. *BioRxiv*  
698 2020.06.10.144816.

699 Ksiazek, T.G., Erdman, D., Goldsmith, C.S., Zaki, S.R., Peret, T., Emery, S., Tong, S., Urbani, C.,  
700 Comer, J.A., Lim, W., et al. (2003). A novel coronavirus associated with severe acute respiratory  
701 syndrome. *N. Engl. J. Med. 348*, 1953–1966.

702 Lam, T.T.Y., Shum, M.H.H., Zhu, H.C., Tong, Y.G., Ni, X.B., Liao, Y.S., Wei, W., Cheung,  
703 W.Y.M., Li, W.J., Li, L.F., et al. (2020). Identifying SARS-CoV-2 related coronaviruses in Malayan  
704 pangolins. *Nature*.

705 Lamers, M.M., Beumer, J., van der Vaart, J., Knoops, K., Puschhof, J., Breugem, T.I., Ravelli,  
706 R.B.G., Paul van Schayck, J., Mykytyn, A.Z., Duimel, H.Q., et al. (2020). SARS-CoV-2 productively  
707 infects human gut enterocytes. *Science 369*, 50–54.

708 Letko, M., Marzi, A., and Munster, V. (2020). Functional assessment of cell entry and receptor usage  
709 for SARS-CoV-2 and other lineage B betacoronaviruses. *Nat. Microbiol. 5*, 562–569.

710 Li, K., Markosyan, R.M., Zheng, Y.M., Golfetto, O., Bungart, B., Li, M., Ding, S., He, Y., Liang, C.,  
711 Lee, J.C., et al. (2013). IFITM Proteins Restrict Viral Membrane Hemifusion. *PLoS Pathog. 9*.

- 712 Major, J., Crotta, S., Llorian, M., McCabe, T.M., Gad, H.H., Priestnall, S.L., Hartmann, R., and  
713 Wack, A. (2020). Type I and III interferons disrupt lung epithelial repair during recovery from viral  
714 infection. *Science* (80- ). eabc2061.
- 715 Mantlo, E., Bukreyeva, N., Maruyama, J., Paessler, S., and Huang, C. (2020). Antiviral activities of  
716 type I interferons to SARS-CoV-2 infection. *Antiviral Res.* 179, 104811.
- 717 Matsuyama, S., Nagata, N., Shirato, K., Kawase, M., Takeda, M., and Taguchi, F. (2010). Efficient  
718 Activation of the Severe Acute Respiratory Syndrome Coronavirus Spike Protein by the  
719 Transmembrane Protease TMPRSS2. *J. Virol.* 84, 12658–12664.
- 720 Narayana, S.K., Helbig, K.J., McCartney, E.M., Eyre, N.S., Bull, R.A., Eltahla, A., Lloyd, A.R., and  
721 Beard, M.R. (2015). The interferon-induced transmembrane proteins, IFITM1, IFITM2, and IFITM3  
722 inhibit hepatitis C virus entry. *J. Biol. Chem.* 290, 25946–25959.
- 723 Nchioua, R., Kmiec, D., Müller, J., Conzelmann, C., Groß, R., Swanson, C., Neil, S., Stenger, S.,  
724 Sauter, D., Münch, J., et al. (2020). The Zinc Finger Antiviral Protein restricts SARS-CoV-2.  
725 *BioRxiv* 2020.06.04.134379.
- 726 Perreira, J.M., Chin, C.R., Feeley, E.M., and Brass, A.L. (2013). IFITMs restrict the replication of  
727 multiple pathogenic viruses. *J. Mol. Biol.* 425, 4937–4955.
- 728 Pfaender, S., Mar, K.B., Michailidis, E., Kratzel, A., Hirt, D., V'kovski, P., Fan, W., Ebert, N.,  
729 Stalder, H., Kleine-Weber, H., et al. (2020). LY6E impairs coronavirus fusion and confers immune  
730 control of viral disease. *BioRxiv Prepr. Serv. Biol.* 2020.03.05.979260.
- 731 Rentsch, M.B., and Zimmer, G. (2011). A vesicular stomatitis virus replicon-based bioassay for the  
732 rapid and sensitive determination of multi-species type I interferon. *PLoS One*.
- 733 Sa Ribero, M., Jouvenet, N., Dreux, M., and Nisole, S. (2020). Interplay between SARS-CoV-2 and

- 734 the type I interferon response. *PLoS Pathog.* *16*, e1008737.
- 735 Sallard, E., Lescure, F.X., Yazdanpanah, Y., Mentre, F., and Peiffer-Smadja, N. (2020). Type 1  
736 interferons as a potential treatment against COVID-19. *Antiviral Res.* *178*, 104791.
- 737 Shi, G., Schwartz, O., and Compton, A.A. (2017). More than meets the I: The diverse antiviral and  
738 cellular functions of interferon-induced transmembrane proteins. *Retrovirology* *14*.
- 739 Shi, G., Kenney, A.D., Kudryashova, E., Zhang, L., Hall-Stoodley, L., Robinson, R.T., Kudryashov,  
740 D.S., Compton, A.A., and Yount, J.S. (2020). Opposing activities of IFITM proteins in SARS-CoV-  
741 2 infection. *BioRxiv* 2020.08.11.246678.
- 742 Smith, S.E., Weston, S., Kellam, P., and Marsh, M. (2014). IFITM proteins - Cellular inhibitors of  
743 viral entry. *Curr. Opin. Virol.* *4*, 71–77.
- 744 Sparrer, K.M.J., and Gack, M.U. (2015). Intracellular detection of viral nucleic acids. *Curr. Opin.*  
745 *Microbiol.* *26*, 1–9.
- 746 Volcic, M., Sparrer, K.M.J., Koepke, L., Hotter, D., Sauter, D., Stürzel, C.M., Scherer, M.,  
747 Stamminger, T., Hofmann, T.G., Arhel, N.J., et al. (2020). Vpu modulates DNA repair to suppress  
748 innate sensing and hyper-integration of HIV-1. *Nat. Microbiol.*
- 749 Wrensch, F., Winkler, M., and Pöhlmann, S. (2014). IFITM proteins inhibit entry driven by the  
750 MERS-Coronavirus Spike protein: Evidence for Cholesterol-Independent Mechanisms. *Viruses* *6*,  
751 3683–3698.
- 752 Yount, J.S., Moltedo, B., Yang, Y.Y., Charron, G., Moran, T.M., López, C.B., and Hang, H.C.  
753 (2010). Palmitoylome profiling reveals S-palmitoylation-dependent antiviral activity of IFITM3. *Nat.*  
754 *Chem. Biol.* *6*, 610–614.
- 755 Zang, R., Case, J.B., Castro, M.F.G., Liu, Z., Zeng, Q., Zhao, H., Son, J., Rothlauf, P.W., Hou, G.,

- 756 Bose, S., et al. (2020). Cholesterol 25-hydroxylase suppresses SARS-CoV-2 replication by blocking  
757 membrane fusion. *BioRxiv* 2020.06.08.141077.
- 758 Zani, A., and Yount, J.S. (2018). Antiviral Protection by IFITM3 In Vivo. *Curr. Clin. Microbiol.*  
759 *Reports* 5, 229–237.
- 760 Zhao, X., Guo, F., Liu, F., Cuconati, A., Chang, J., Block, T.M., and Guo, J.T. (2014). Interferon  
761 induction of IFITM proteins promotes infection by human coronavirus OC43. *Proc. Natl. Acad. Sci.*  
762 *U. S. A.* 111, 6756–6761.
- 763 Zhao, X., Sehgal, M., Hou, Z., Cheng, J., Shu, S., Wu, S., Guo, F., Le Marchand, S.J., Lin, H., Chang,  
764 J., et al. (2017). Identification of Residues Controlling Restriction versus Enhancing Activities of  
765 IFITM Proteins on Entry of Human Coronaviruses. *J. Virol.* 92.
- 766 Zhao, X., Li, J., Winkler, C.A., An, P., and Guo, J.T. (2019). IFITM genes, variants, and their roles  
767 in the control and pathogenesis of viral infections. *Front. Microbiol.* 10.
- 768 Zhao, X., Zheng, S., Chen, D., Zheng, M., Li, X., Li, G., Lin, H., Chang, J., Zeng, H., and Guo, J.-T.  
769 (2020). LY6E Restricts the Entry of Human Coronaviruses, Including the Currently Pandemic SARS-  
770 CoV-2. *J. Virol.*
- 771 Zhou, P., Yang, X. Lou, Wang, X.G., Hu, B., Zhang, L., Zhang, W., Si, H.R., Zhu, Y., Li, B., Huang,  
772 C.L., et al. (2020). A pneumonia outbreak associated with a new coronavirus of probable bat origin.  
773 *Nature* 579, 270–273.
- 774

# Figure 1

Prelli Bozzo et al.

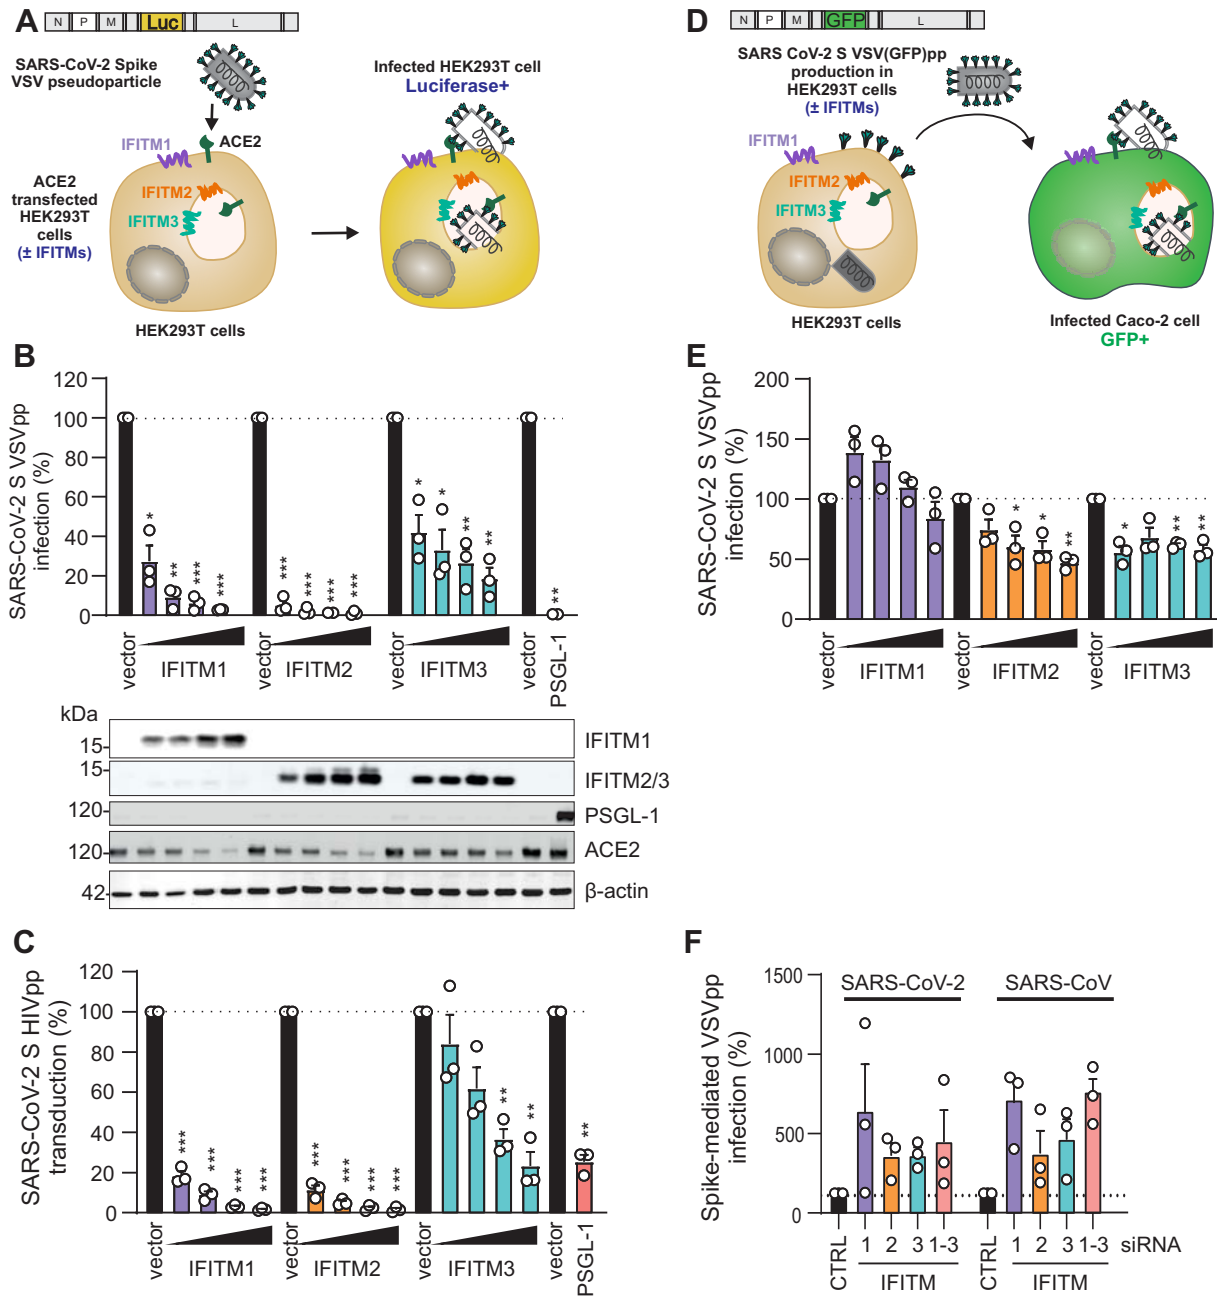

## Figure 2

Prelli Bozzo et al.

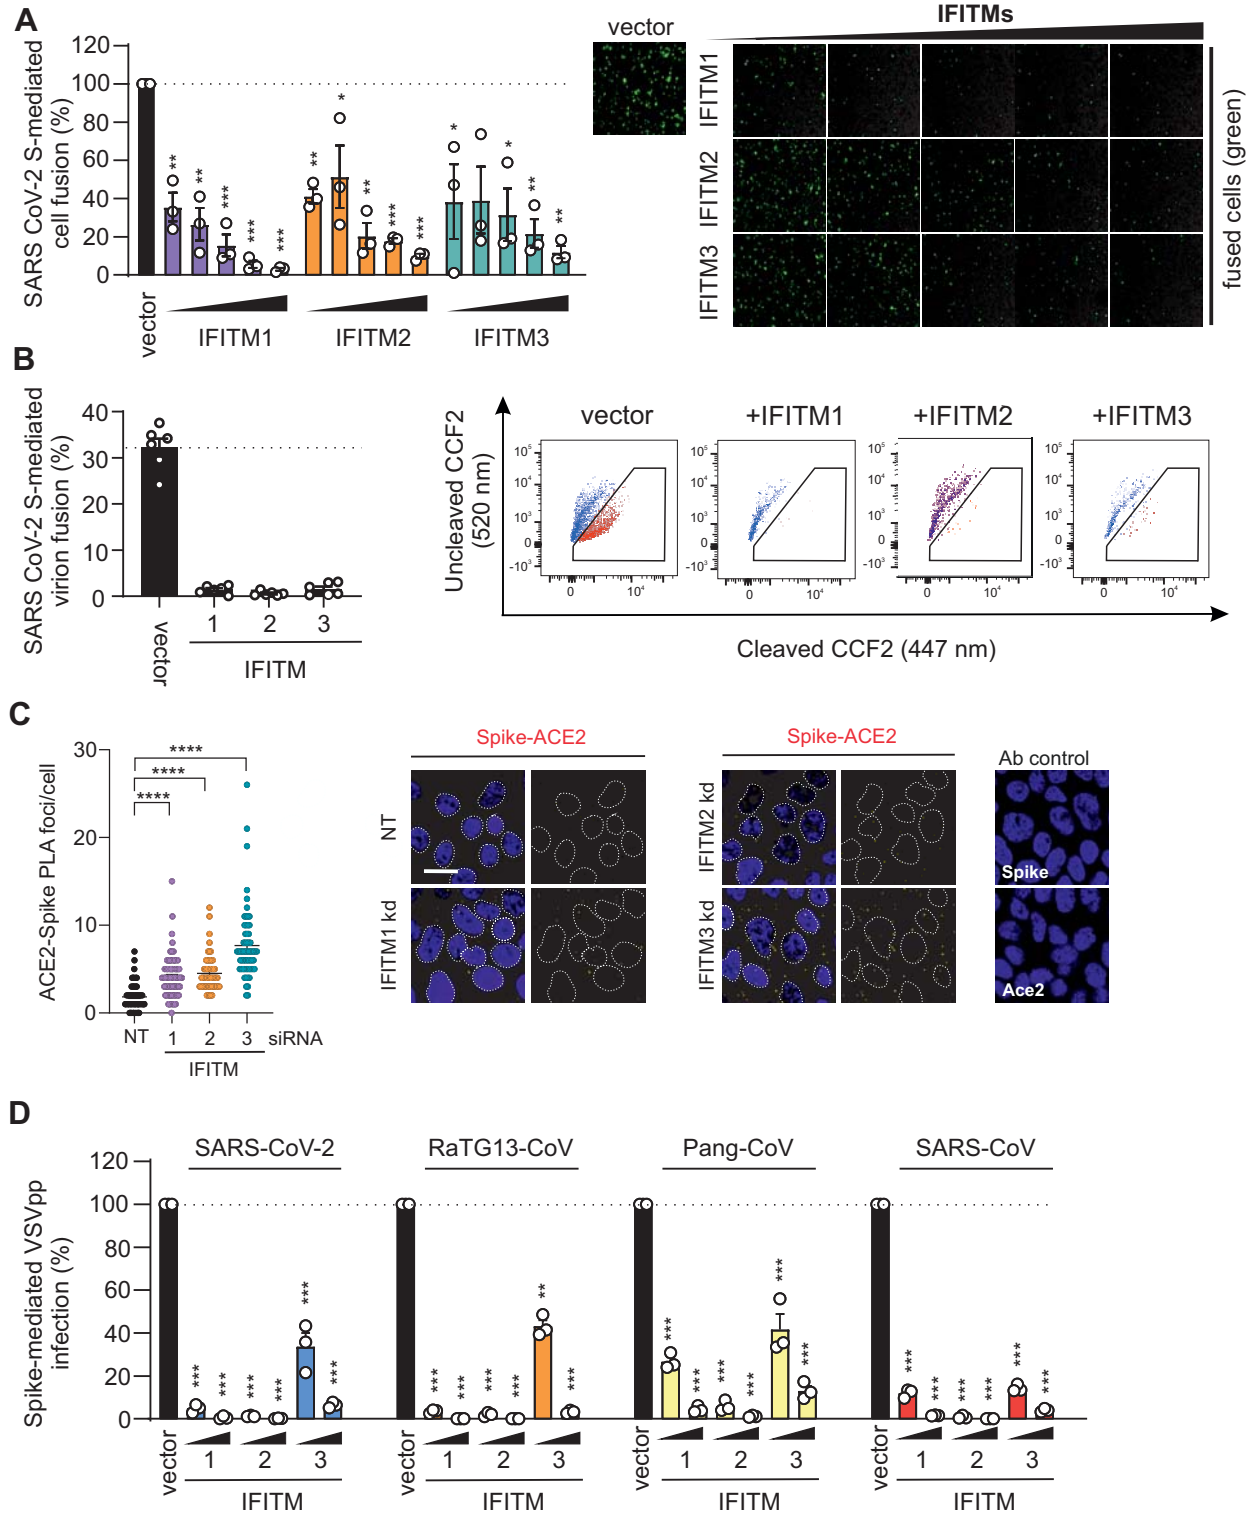

# Figure 3

Prelli Bozzo et al.

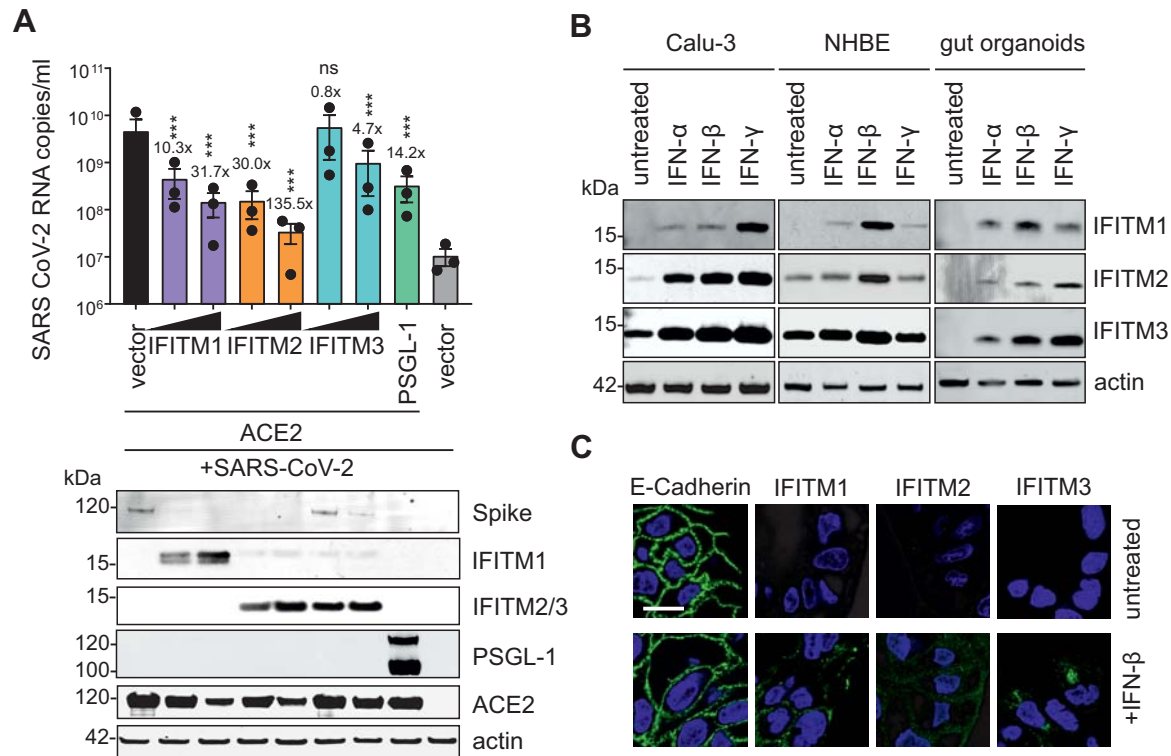



# Figure 4

Prelli Bozzo et al.

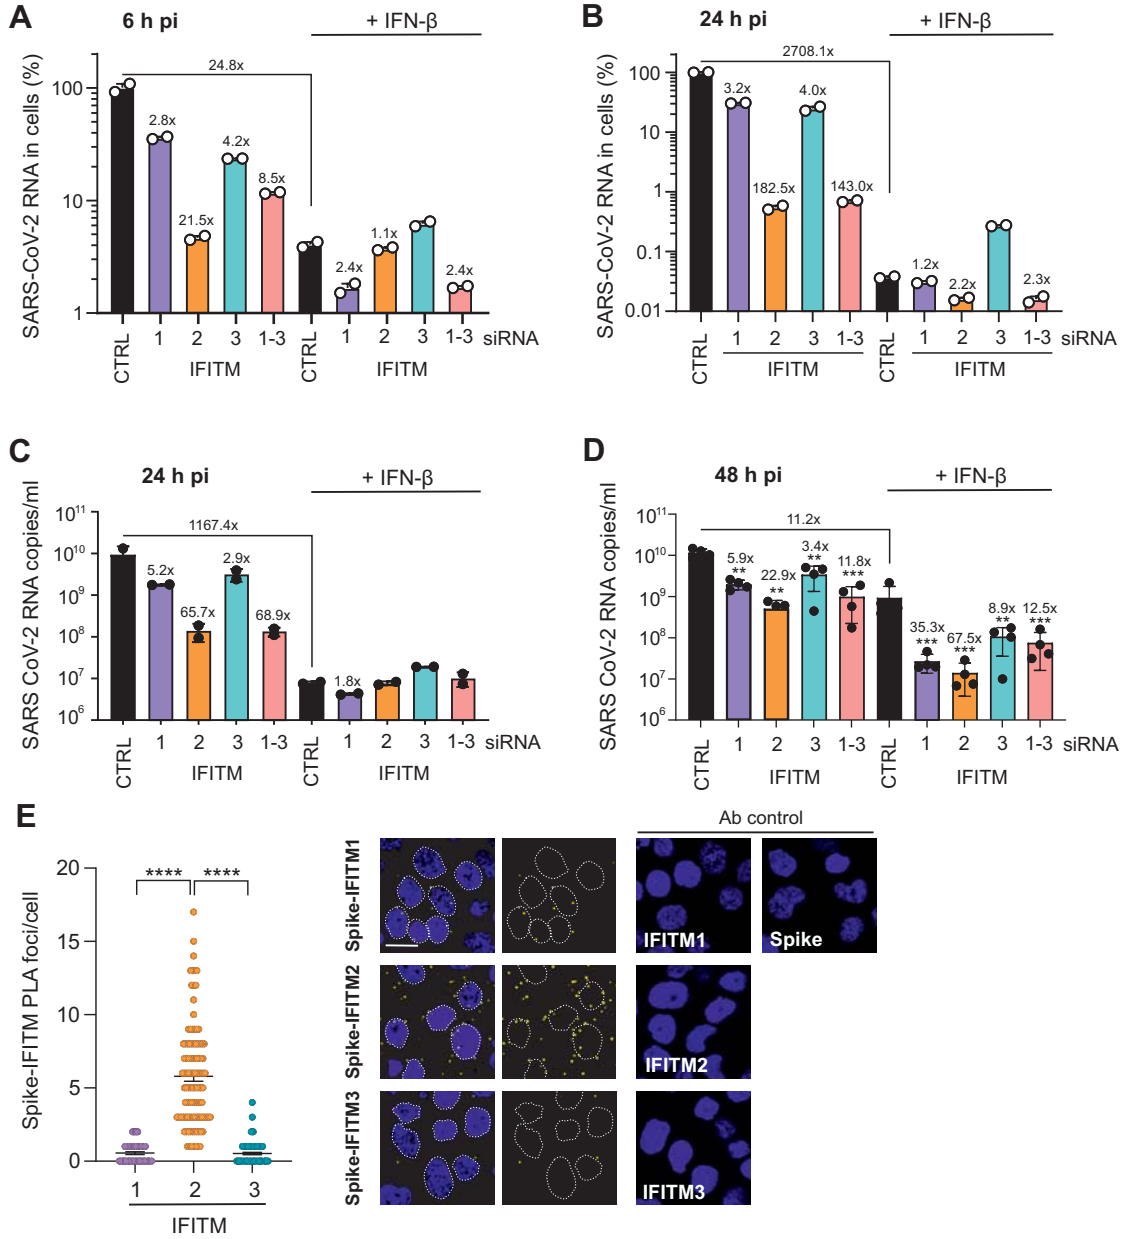

## SUPPLEMENTAL FIGURES

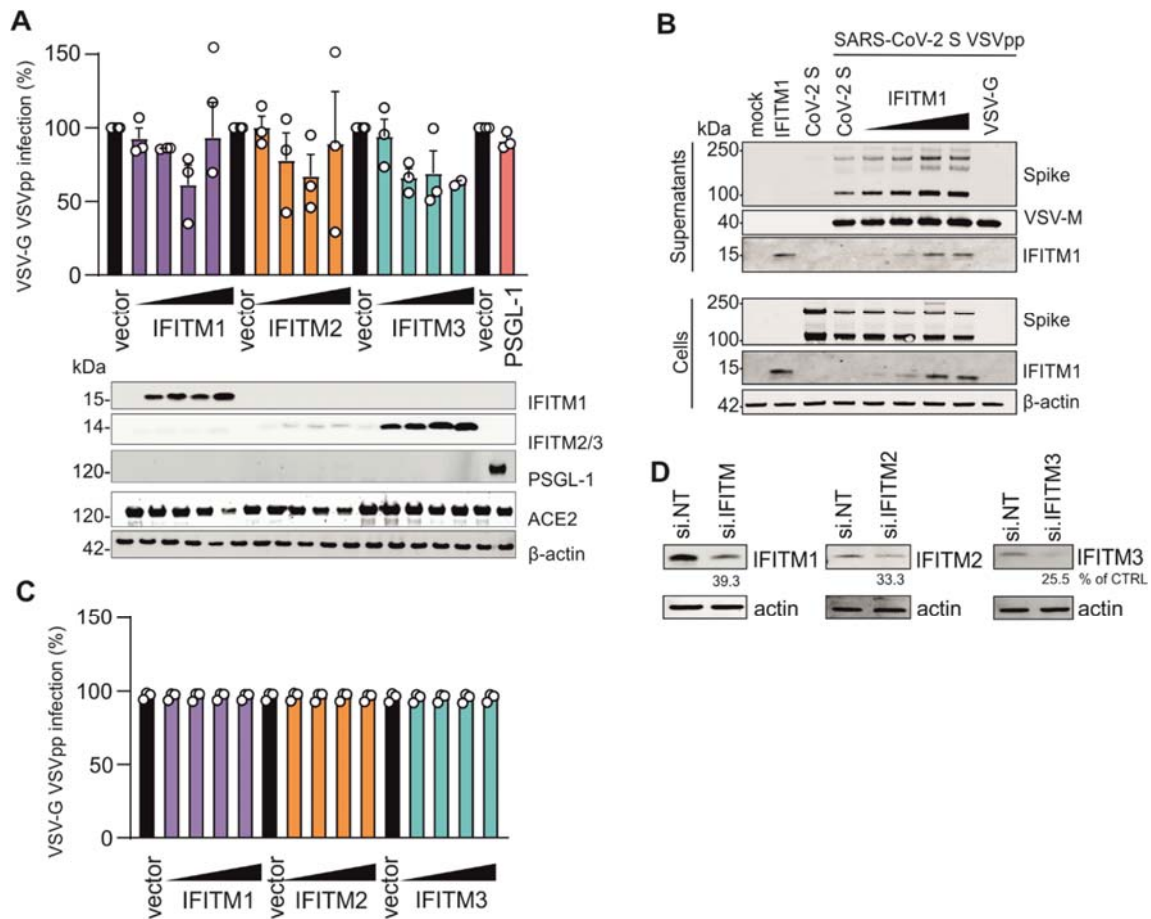

**Figure S1 (related to Figure 1). VSV-G-mediated infection by VSVpp is not significantly inhibited by IFITM proteins.**

(A) Quantification of VSV(luc) $\Delta$ G\*VSV-G entry by luciferase activity in HEK293T cells transiently expressing indicated proteins and infected 24h post transfection with VSV(luc) $\Delta$ G\*VSV-G (MOI 0.025) for 16 h. Bars represent means of  $n=3\pm$ SEM. Lower panel: Immunoblot of the corresponding whole cell lysates (WCLs) stained with anti-IFITM1, anti-IFITM2, anti-IFITM3, anti-PSGL-1, anti-ACE2 and anti-actin. (B) Immunoblot analysis of whole cell or supernatant lysates of HEK293T cells transiently transfected with SARS-CoV-2 S VSVpp and increasing doses of IFITM1 expression construct. Blots were stained with anti-Spike, anti-VSV-M, anti-IFITM1 and anti-actin. (C) Quantification of VSV(luc) $\Delta$ G\*VSV-G particles by luciferase activity in Caco-2 cells infected with the supernatant from HEK293T cells transiently transfected with VSV-G and empty control or IFITM expression vectors. Bars represent means of  $n= 3\pm$ SEM. (D) Exemplary immunoblots of whole cell lysates of Calu-3 cells transiently transfected with control siRNA (si.NT) or siRNAs targeting IFITM1, 2 or 3 as indicated. Percentages indicate signal intensity of the three IFITM proteins relative to those observed in the presence of the control siRNA (100%).

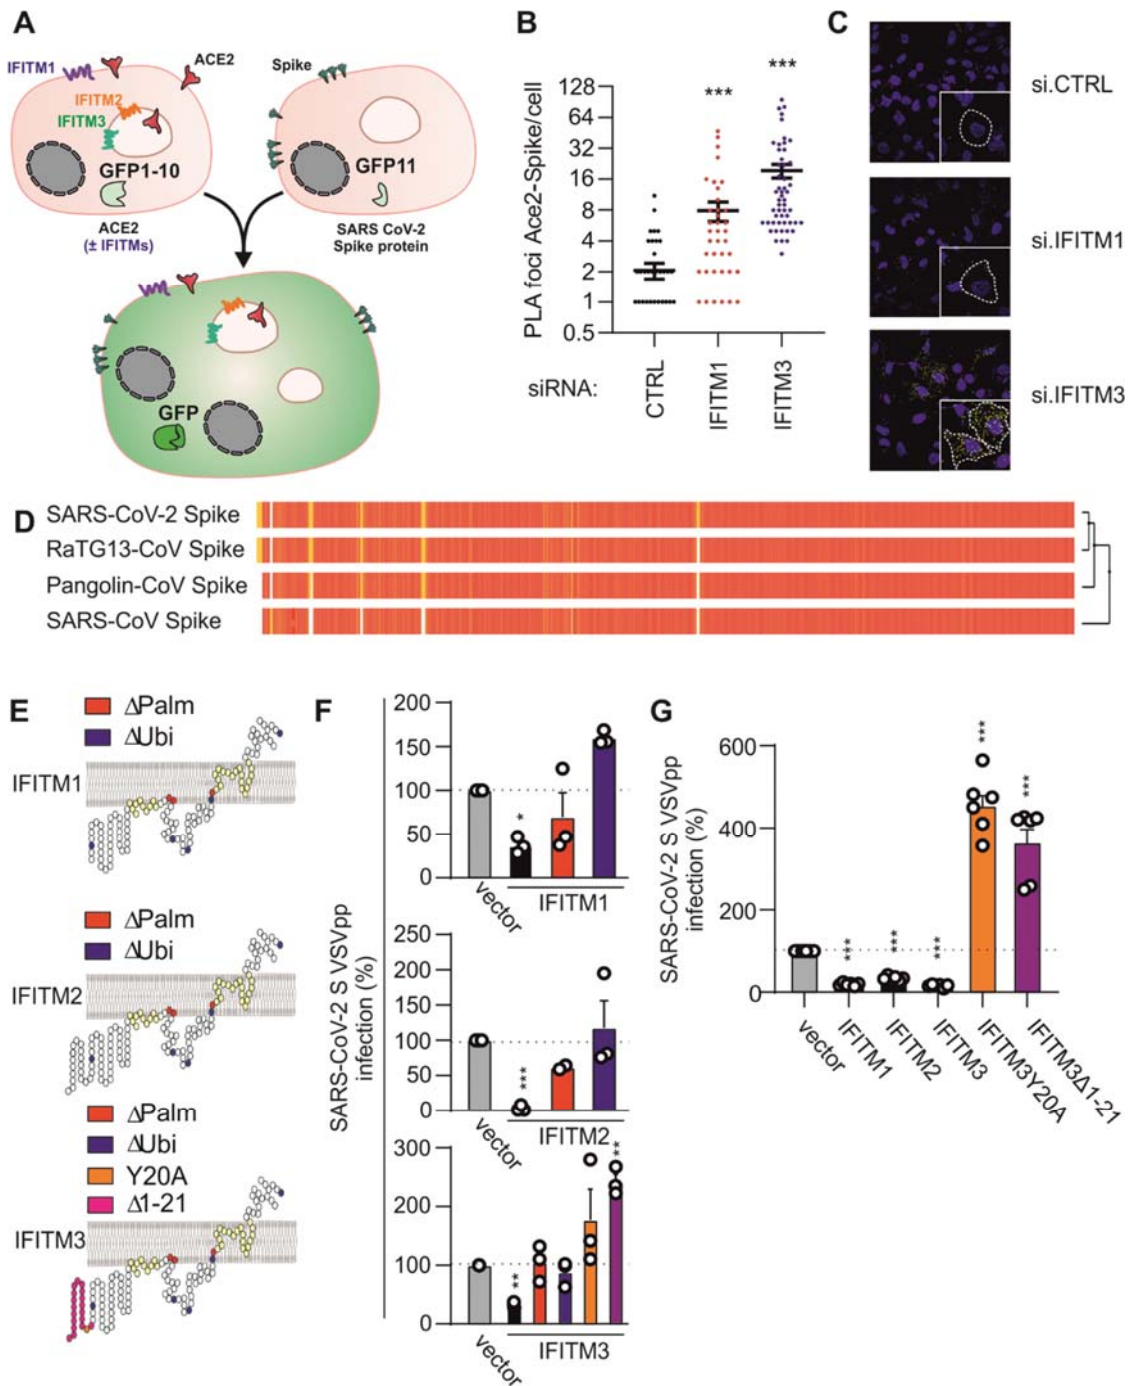

**Figure S2 (related to Figure 2). Spectrum and determinants of the Spike-mediated fusion inhibition of IFITMs.**

(A) Schematic depiction of the Split-GFP fusion assay. (B) Proximity ligation assay of ACE2 and SARS-CoV-2 Spike in HeLa cells. Cells were transfected with siRNA (CTRL, IFITM1 and IFITM3) and infected with VSV(luc) $\Delta$ G\*SARS-CoV-2-S for 2 h at 4°C. Lines represent means of n=(77-84 cells) $\pm$ SEM. (C) Exemplary images of the PLA assay shown in panel B. Spike-ACE2 PLA signal (red). Nuclei, DAPI (blue). The inset depicts a magnification, membrane outline of a cell depicted by a dotted white line. Scale bar, 20  $\mu$ m. (D) Alignment of the Spike amino acid sequences from SARS-CoV-2, Pangolin-CoV, RaTG13-CoV and SARS-CoV. Yellow, low conservation; red, high conservation. Right panel: Neighbor-joining tree showing the phylogenetic relation of the sequences. (E) Schematic depiction of the three IFITM proteins in relation to the plasma membrane. Yellow, transmembrane parts. Alanine substitutions are color coded. Blue, Ubiquitination-negative mutant. Red, Palmitoylation negative mutant. Pink, Y20A. orange, Nt $\Delta$ 21AA20. (F) Quantification of the entry of VSV(luc) $\Delta$ G\*-SARS-CoV-2-S by luciferase activity in HEK293T cells transiently expressing indicated proteins (IFITM mutants) and infected 24 h post-transfection with the VSVpp (MOI 0.025) for 16 h. Bars represent means of n=3 $\pm$ SEM. (G) Quantification of the entry of HIV(Fluc) $\Delta$ env\*-SARS-CoV-2-S by luciferase activity in HEK293T cells stably expressing indicated proteins (IFITM mutants) and ACE2. The cells were transduced with the HIVpp for 48h. Bars represent means of n=6 $\pm$ SEM.

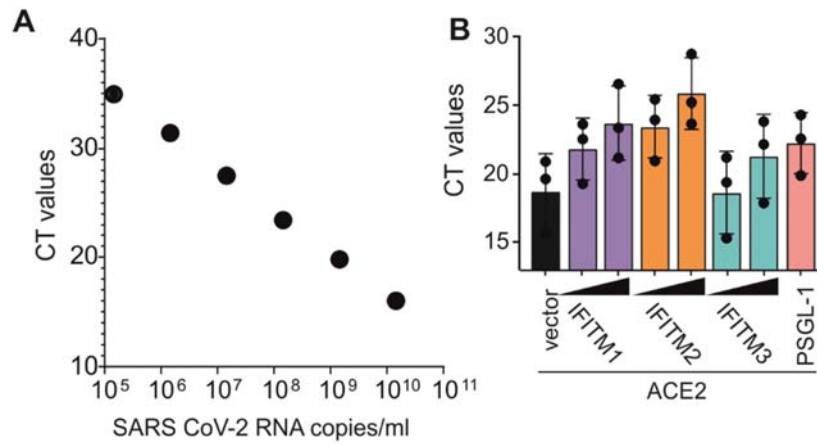

**Figure S3 (related to Figure 3). Quantification of SARS-CoV-2 N gene RNA by qRT-PCR in the supernatant of virally infected HEK293T cells.**

Standard curve (left) and raw qRT-PCR CT values (right) corresponding to the SARS-CoV-2 RNA copy numbers per ml shown in Figure panel A. The bar diagram shows mean raw qRT-PCR (+/- SD) from three replicates.

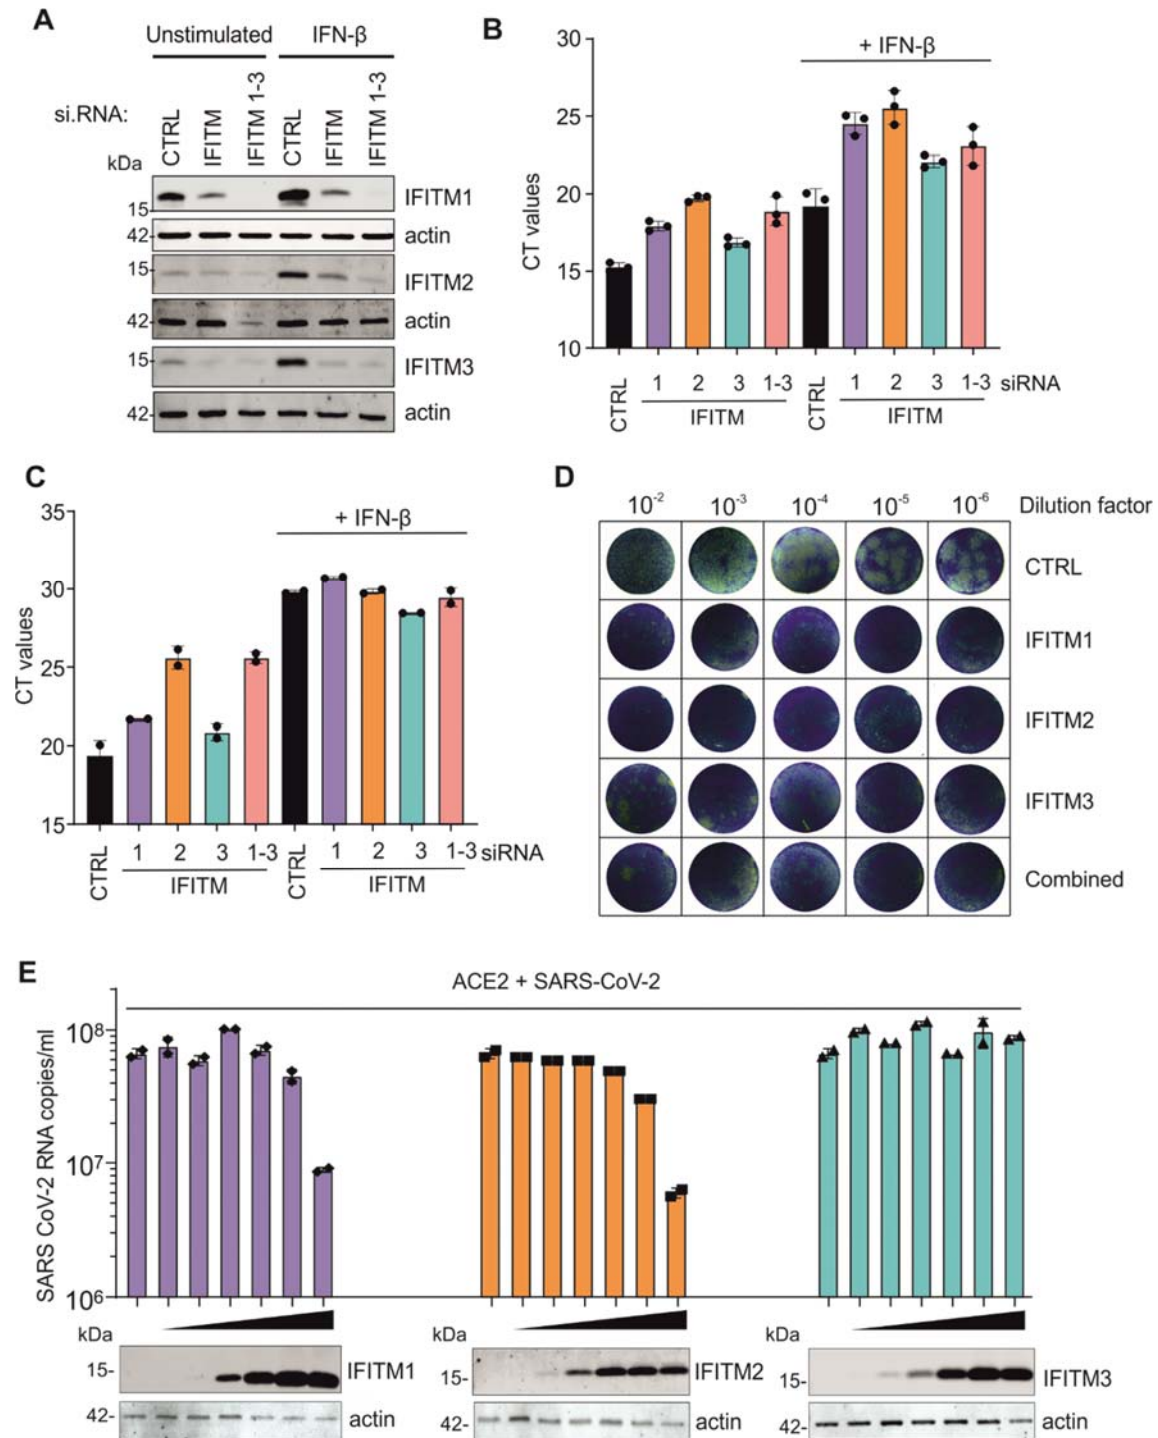

**Figure S4 (related to Figure 2). Impact of endogenous and transient IFIM expression on SARS-CoV-2 replication.**

(A) Exemplary immunoblots of whole cell lysates of Calu-3 cells transiently transfected with siRNA either control (si.NT) or targeting IFITM1, 2, 3 (si.IFITM1, 2, 3) as indicated. (B, C) Raw Ct values of the viral N gene RNA levels shown in Figure 4 panel C and D. (D) CPE (white) after 72h caused by infection of monolayers of Vero cells with serial dilutions of Calu-3 supernatants from Figure 4D. Cells were stained with crystal violet (blue). (E) SARS-CoV-2 RNA production from HEK293T cells transiently expressing ACE2 and increasing levels of the indicated IFITM proteins. Quantification of viral N gene RNA by qRT-PCR in the supernatant of HEK293T was performed 48 h post-infection with SARS-CoV-2 (MOI 0.05). Bars represent means of  $n=2 \pm \text{SEM}$ .
